# Supplementary material for: Recognition and coacervation of G-quadruplexes by a multifunctional disordered region in RECQ4 helicase
Source: Nat Commun. 2023 Oct 24;14:6751. doi: 10.1038/s41467-023-42503-z (PMC10598209; doi:10.1038/s41467-023-42503-z)
Supplement: Supplementary file 4 — Source data [file 41467_2023_42503_MOESM4_ESM.xlsx]

## Sheet: Figure 3c
Figure 3c
Fluorescent Anisotropy: RSM binding to ssDNA, dsDNA, hybrid G4 or parallel G4 (70 mM or 500 mM ionic strength (3 replicates)
			ssDNA						dsDNA						hybrid G4						parallel G4
		RSM (nM)	70 mM			500 mM			70 mM			500 mM			70 mM			500 mM			70 mM			500 mM
		0	0	0	0	0	0	0	0	0	0	0	0	0	0	0	0	0	0	0	0	0	0	0	0	0
		0.25	23	6.5	6.2	14.9	36.5	0.9	22	18.4	18.4	18.4	15.2	26.4	92.3	116.8	101.9	7.2	-0.2	1.7	47	19.3	42.7	9.5	14.7	9.1
		0.5	61.7	17.3	20.5	33	61.7	20.1	52.4	48.4	48.4	51.3	57.1	68.1	124.4	128.7	124.5	19.9	10.9	12.7	60.9	37.2	57.7	20.9	13.8	19.7
		0.75	70.8	57.3	55.3	17.7	43.2	45.8	72.1	72.3	72.3	49.7	62.3	62.5	132.6	141.5	131.7	25.9	17.9	38	60.4	31.7	66	20.6	25.9	28.7
		1	88.9	84.4	81.6	11.2	21.9	34.8	88.9	79.1	79.1	27.8	31.4	25.3	144.7	152.5	145.4	45.9	33.7	65.5	74.4	56.6	77.8	34.8	26.8	33.8
		1.5	99.7	103.6	98.8	4.9	15.3	-4.4	102.2	100.5	100.5	38.1	53.2	37.6	150.1	163.3	151.2	62.5	45.1	73.7	70.6	60.6	73.3	36.8	30.4	36.3
		2	111.1	101.6	88.3	14.1	21.3	33.7	107.6	105.5	105.5	26	23.3	25	155.5	167.6	156.3	58.4	48.9	74.3	68.3	61.8	69.7	27.9	25.4	34.7
		2.5	112.3	109.7	105.6	33	45.1	43.7	116	112.1	112.1	26.2	38.2	28.1	166.7	172.9	161.9	56.9	51.2	79.2	62.2	60.8	60.9	28.1	24.3	30.9
		5	128.2	126.2	125	35.3	39.2	36.1	124	126	126	33.1	37.3	19	177.3	177.9	171.7	62.2	53.8	87.1	66	61.4	68.2	33.8	27.6	37.6
		10	131.7	132.5	127.1	35	42.9	44.6	134.3	131.3	131.3	26.3	47.4	43.3	181	185.5	173	82.6	61.4	87.6	74	69.5	71	43.3	34.2	43.1
		15	132.9	131	145.6	22.1	33.4	20.2	138.2	140.1	140.1	20.7	32.8	17.5	180.6	181.3	184.6	74.7	68	93.6	75.9	61.5	73.9	45.3	39.8	44.4

## Sheet: Figure 3d
Figure 3d
Effect of increasing NaCl concentration on RSM binding to CEB1 G4 or ds49 (EMSA, 3 replicates)
		NaCl (mM)	CEB1 G4 (%)			ds49 (%)
		0	100	100	100	100	100	100
		0	3.57028	2.16921	2.14775	0.463683	0	0.135422
		125	7.26545	6.41825	5.01251	6.42689	3.80735	3.07756
		250	11.3971	10.2663	7.56112	43.9216	59.8018	46.5868
		350	11.478	19.1065	9.47735	57.2899	82.6579	65.3206
		500	16.0679	32.5628	11.6931	77.5077	92.5208	76.3046
		750	56.9086	37.4022	63.6877	84.7272	120.525	116.562
		1000	54.6288	56.8356	78.5813	94.8228	94.3939	96.8682

## Sheet: Figure 4a
Figure 4a
Relaxation parameters
		RCI-S^2							R2
		RSM residue	RSM FREE	RSM + DNA	RSM + RPA				RSM residue	RSM FREE	RSM FREE, error		RSM residue	RSM + DNA	RSM + DNA, error		RSM residue	RSM + RPA	RSM + RPA, error
		348	0.0617422	0.0617422	0.119767				348	1.85943	0.13009		348	3.18599	0.755393		348	2.80513	0.157669
		349	0.0617422	0.0617422	0.124383				349	2.0044	0.0576327		350	3.52317	0.237909		349	3.43494	0.0737616
		350	0.0820165	0.0987333	0.169411				350	2.01019	0.0361374		351	3.33028	0.271355		350	3.59317	0.0520159
		351	0.103734	0.146895	0.229272				351	2.29207	0.0418946		352	4.12999	0.316212		351	3.8961	0.0619904
		352	0.126698	0.212972	0.311681				352	2.3551	0.0538341		353	4.99927	0.287319		352	4.36397	0.0794202
		353	0.12708	0.237386	0.350498				353	2.25057	0.0309452		354	5.34719	0.273165		353	5.05047	0.0584526
		354	0.12708	0.244615	0.373259				354	2.54277	0.0279728		357	5.33225	0.342603		354	6.44718	0.067808
		355	0.12708	0.243365	0.371875				355	2.79133	0.0329527		358	5.57275	0.353042		355	6.80647	0.0755314
		356	0.12708	0.244133	0.380567				356	2.7925	0.0318212		359	5.85641	0.324312		357	7.10344	0.108723
		357	0.12708	0.267287	0.400152				357	2.8418	0.0492114		360	5.51353	0.330264		360	7.70639	0.101801
		358	0.12708	0.281222	0.426021				358	3.03864	0.0535257		361	5.97917	0.391637		361	8.55568	0.149781
		359	0.12708	0.285665	0.443381				359	3.00992	0.0413674		362	5.87336	0.881035		362	9.66103	0.361986
		360	0.158148	0.25482	0.459706				360	2.85797	0.0397527		363	7.03404	0.641596		363	9.45037	0.2205
		361	0.201214	0.21801	0.476475				361	3.15239	0.0500092		364	8.40983	0.539386		364	10.9125	0.191365
		362	0.272229	0.219695	0.501101				362	3.28717	0.146753		365	7.04333	0.463468		365	12.226	0.234556
		363	0.231417	0.23198	0.499049				363	3.41014	0.0738719		366	8.1224	0.637216		366	10.9162	0.278417
		364	0.185161	0.244007	0.510515				364	3.23299	0.0370301		367	6.929	0.479363		367	11.8826	0.247348
		365	0.12708	0.191405	0.532162				365	3.25824	0.0412582		368	7.19594	0.453036		368	11.85	0.25381
		366	0.12933	0.159057	0.580598				366	3.15478	0.0575769		369	9.32951	0.689453		369	15.8647	0.431433
		367	0.12933	0.156264	0.642888				367	3.24058	0.0495624		371	9.69282	0.87607		371	16.0283	0.450977
		368	0.12933	0.200727	0.692799				368	3.01601	0.0450157		372	7.05835	0.636582		373	11.9596	0.192017
		369	0.12708	0.263258	0.739934				370	3.37287	0.0460947		373	9.00987	0.555691		374	13.756	0.27767
		370	0.149654	0.330023	0.772442				371	3.41645	0.0644124		374	9.0662	0.509071		375	12.9453	0.272468
		371	0.180819	0.383487	0.78586				372	3.62568	0.0635526		375	7.39823	0.373646		377	15.5192	0.407799
		372	0.1863	0.392902	0.782723				373	3.26274	0.0351621		376	8.57312	0.659298		378	14.6122	0.454588
		373	0.161626	0.3533	0.760134				374	3.19296	0.031069		377	8.22555	0.717226		379	11.8098	0.205086
		374	0.131868	0.31659	0.74974				376	3.43664	0.0459891		380	8.51601	0.814944		381	15.2203	0.305495
		375	0.12708	0.312317	0.748741				377	3.33822	0.0514652		382	8.66017	0.703329		383	11.8403	0.202367
		376	0.185391	0.351437	0.748782				378	3.05935	0.0511597		383	7.78011	0.530795		384	9.1173	0.136476
		377	0.251089	0.392272	0.739433				379	3.04274	0.0348196		384	6.97059	0.625561		385	5.48731	0.062032
		378	0.340996	0.435902	0.722287				380	3.14327	0.0409108		386	3.90298	0.225292		386	4.44465	0.0494796
		379	0.328152	0.459768	0.705295				381	2.9754	0.0406899		387	2.40373	0.218426		387	2.75372	0.0500616
		380	0.322111	0.472598	0.680182				382	2.90059	0.0453683		388	1.77439	0.102204		388	1.63647	0.02075
		381	0.32345	0.454173	0.637261				383	2.60682	0.0345413
		382	0.331913	0.451526	0.575746				384	2.3561	0.0360366
		383	0.302256	0.435171	0.448539				385	2.24402	0.029257
		384	0.218816	0.388795	0.357959				386	1.98963	0.0257358
		385	0.155461	0.332128	0.278254				387	1.56395	0.0341649
		386	0.101421	0.237769	0.202893				388	0.917433	0.0165002
		387	0.0798257	0.175561	0.137675
		388	0.0617422	0.127768	0.0957167

## Sheet: Figure 5a+SuppFig 16b
Figure 5a and Supplementary Figure 16b
CD titrations of 10 uM T95-2T parallel G4 with sRSM																	ITC analysis
			sRSM concentration (μM)															Molar ratio
		Wavelength (nm)	0	1.25	2.5	3.75	5	7.5	10	15	20	30	40					0.01952	-9138.53
		330	0.327717	-0.225141	-1.00303	-0.36773	-0.98533	-0.836987	-0.192873	-1.33663	-0.799626	-0.322811	-0.981788					0.1177	-15665.3
		329	0.414719	-0.0937319	-0.919427	-0.371501	-0.806997	-0.688247	-0.258468	-1.19452	-0.570089	-0.13981	-0.778029					0.21683	-15934.1
		328	0.355073	-0.194065	-0.878002	-0.158985	-0.824544	-0.775419	-0.0417751	-1.10068	-0.58929	-0.163176	-0.782126					0.31691	-15538.6
		327	0.0240567	-0.378001	-1.37273	-0.659643	-1.21974	-1.14943	-0.552319	-1.41123	-0.961685	-0.55329	-1.25319					0.41794	-14824.9
		326	0.160333	-0.301186	-1.10263	-0.379529	-1.0843	-0.848772	-0.309337	-1.22461	-0.855293	-0.385528	-0.948152					0.51993	-14851.3
		325	0.482495	-0.0264633	-0.88375	-0.115119	-0.803108	-0.714005	-0.0766828	-1.05986	-0.501331	-0.125985	-0.684215					0.62286	-14838.2
		324	0.291501	-0.266119	-0.978749	-0.321404	-1.05783	-0.722965	-0.150948	-1.18863	-0.568767	-0.268327	-0.834475					0.72674	-15476.3
		323	0.383529	-0.200645	-0.943907	-0.382295	-0.933281	-0.751778	-0.109285	-1.11913	-0.588597	-0.258817	-0.767184					0.83158	-16857.9
		322	0.422654	-0.211064	-1.00372	-0.235453	-0.946303	-0.788178	-0.151919	-1.08366	-0.600508	-0.269026	-0.829734					0.93736	-15199.2
		321	0.292547	-0.152652	-1.10468	-0.212371	-0.95327	-0.71719	-0.00214837	-1.00432	-0.503273	-0.144854	-0.708075					1.0441	-8210.16
		320	0.392606	-0.0546141	-0.762619	-0.140412	-0.680436	-0.789846	-0.0714245	-1.07483	-0.489757	-0.112991	-0.739008					1.15179	-3306.32
		319	0.263273	-0.151433	-0.949906	-0.14605	-0.926282	-0.765984	-0.157037	-1.06453	-0.566934	-0.276047	-0.824725					1.26043	-1375.06
		318	0.346501	-0.143763	-0.739523	-0.236789	-0.825595	-0.617697	0.0885374	-0.985911	-0.515238	-0.231989	-0.62261					1.37002	-877.901
		317	0.385138	0.00199593	-0.879001	-0.0773553	-0.917048	-0.717173	-0.0840921	-1.07403	-0.428596	-0.170455	-0.633165					1.48056	-704.127
		316	0.455591	-0.0122756	-0.826392	-0.0955022	-0.578455	-0.511674	0.0996431	-0.909337	-0.374162	-0.0907297	-0.628239					1.59205	-499.606
		315	0.22855	-0.159272	-0.823963	-0.371388	-0.937578	-0.774325	-0.0297969	-1.01467	-0.503008	-0.150179	-0.757745					1.70449	-419.912
		314	0.366902	0.0281196	-0.902875	-0.112533	-0.712167	-0.670706	-0.0485957	-1.06319	-0.432387	-0.145482	-0.63045					1.81789	-345.051
		313	0.327481	-0.127917	-0.739673	-0.0946213	-0.940288	-0.713802	-0.021317	-1.11485	-0.576322	-0.107921	-0.711164					1.93223	-298.61
		312	0.308332	0.0787266	-0.745737	0.00606558	-0.793104	-0.480455	-0.094791	-0.931615	-0.378007	-0.0343885	-0.468098					2.04752	-304.914
		311	0.27682	-0.213944	-0.853389	-0.36007	-0.920961	-0.869814	-0.152418	-1.06716	-0.37927	-0.315672	-0.817229
		310	0.411759	-0.0105733	-0.785086	-0.0426454	-0.607555	-0.636873	0.0789886	-0.875629	-0.517034	-0.0982183	-0.622143
		309	0.316362	-0.00729069	-0.865652	-0.159555	-0.779017	-0.744439	-0.0150486	-1.12204	-0.440353	-0.141915	-0.676462
		308	0.579235	0.131333	-0.668654	0.0436079	-0.610849	-0.524853	0.115304	-0.914611	-0.179007	0.0830995	-0.564342
		307	0.395226	0.0421696	-0.826846	-0.198534	-0.655164	-0.693083	-0.0476606	-0.963573	-0.297976	-0.153654	-0.615398
		306	0.327973	-0.0956411	-0.717738	-0.201275	-0.589971	-0.732926	-0.0563702	-1.01021	-0.450502	-0.26749	-0.654997
		305	0.471046	0.213866	-0.620491	0.0542987	-0.551491	-0.497087	0.0195988	-0.839473	-0.10139	0.0225458	-0.504579
		304	0.137309	-0.00192454	-0.687073	-0.13356	-0.75514	-0.638101	0.0743015	-1.04331	-0.537447	-0.132451	-0.780328
		303	0.391255	0.062182	-0.584122	0.080099	-0.489107	-0.380635	0.0370847	-0.849926	-0.229117	-0.0604379	-0.480953
		302	0.494699	0.0849509	-0.712569	-0.180437	-0.677456	-0.485224	0.0310937	-0.916202	-0.402745	-0.0825999	-0.676245
		301	0.45082	0.120213	-0.741144	-0.0654404	-0.779752	-0.559109	0.103757	-0.884113	-0.386488	-0.191025	-0.566109
		300	0.418545	0.0497113	-0.625479	-0.0403343	-0.630855	-0.336035	0.104445	-0.859165	-0.27156	0.0303683	-0.57633
		299	0.410046	0.0824424	-0.67941	-0.042143	-0.619267	-0.559504	0.120083	-0.736071	-0.264296	0.121419	-0.580543
		298	0.286285	0.0367149	-0.689359	-0.100432	-0.642861	-0.660162	0.174182	-0.851516	-0.261645	-0.00745426	-0.503423
		297	0.138082	0.0304091	-0.745766	-0.169545	-0.748049	-0.546353	0.183379	-0.933327	-0.32769	0.00990487	-0.396544
		296	0.119471	-0.198597	-0.880117	-0.238414	-0.875856	-0.643613	-0.111832	-0.757386	-0.435709	-0.0788228	-0.498937
		295	0.203552	-0.172829	-0.978648	-0.333509	-0.837189	-0.697068	0.0893478	-0.749743	-0.430498	-0.111215	-0.488771
		294	0.131044	-0.42163	-0.940871	-0.314827	-0.952603	-0.675453	-0.0763136	-0.847404	-0.387401	-0.0444819	-0.548664
		293	-0.30607	-0.300291	-1.00518	-0.401898	-0.970716	-0.639493	-0.0804369	-0.916871	-0.399189	-0.0710993	-0.734718
		292	-0.0406042	-0.0950639	-0.802825	-0.162966	-0.690203	-0.628186	0.0681519	-0.633291	-0.239241	0.0206737	-0.46977
		291	0.108944	-0.22628	-0.887518	-0.220256	-0.722561	-0.652766	0.0794451	-0.817411	-0.215298	0.0174752	-0.480846
		290	0.20933	0.0260681	-0.749538	-0.0842714	-0.673009	-0.424503	0.239245	-0.701624	-0.192303	0.0598255	-0.52685
		289	0.146947	0.0382879	-0.609701	-0.118544	-0.480769	-0.594092	0.183353	-0.710982	-0.150762	0.0567178	-0.491715
		288	0.285223	0.188003	-0.672844	-0.0285503	-0.613111	-0.460798	0.161362	-0.819597	-0.139816	-0.00249184	-0.492574
		287	0.382571	0.235641	-0.706061	0.139261	-0.424869	-0.322048	0.326423	-0.68415	-0.224827	0.0608629	-0.373495
		286	0.489188	0.32241	-0.603851	0.213386	-0.462143	-0.271669	0.0890708	-0.793032	-0.166385	0.0302584	-0.455669
		285	0.616331	0.68906	-0.257594	0.302511	-0.310651	0.0168575	0.3437	-0.757573	-0.214985	0.235143	-0.50709
		284	0.839951	0.7266	-0.0737204	0.382534	-0.201299	-0.180497	0.330437	-0.648964	-0.130712	0.0908454	-0.417353
		283	1.10543	0.870714	0.120178	0.668305	-0.0545473	0.0197701	0.325815	-0.69882	-0.0436263	0.238444	-0.366723
		282	1.32352	1.01372	0.214933	0.812218	0.170936	0.0321527	0.459131	-0.747445	-0.250964	0.0557064	-0.390798
		281	1.26818	1.25016	0.427696	0.866053	0.131241	0.0948439	0.345627	-0.907445	-0.181123	-0.0699742	-0.477013
		280	1.93203	1.8118	0.986628	1.34501	0.377374	0.446896	0.741072	-0.631484	-0.0182736	0.177753	-0.256356
		279	2.35146	2.20975	1.20227	1.66197	0.662377	0.579655	0.528797	-0.727436	-0.172921	0.169123	-0.379514
		278	2.86108	2.80036	1.75782	2.03331	1.17467	0.814502	0.883688	-0.687859	-0.0742948	0.172683	-0.386547
		277	3.21225	3.26479	2.07881	2.38894	1.35943	1.01637	0.911178	-0.721233	-0.0847243	0.223451	-0.372756
		276	3.97722	3.95169	2.79408	2.95771	1.88916	1.34689	1.09459	-0.50479	-0.025702	0.338336	-0.17339
		275	4.5616	4.53295	3.25639	3.43849	2.15379	1.53599	1.11788	-0.677221	-0.127729	0.22219	-0.165957
		274	5.35929	5.35294	4.13877	4.15264	2.59639	1.85211	1.49939	-0.532798	0.150906	0.369947	-0.0398248
		273	5.83048	5.99262	4.48415	4.4441	2.97452	2.0636	1.36921	-0.759529	-0.07495	0.154661	-0.276273
		272	6.53508	6.61688	5.19289	5.03649	3.41189	2.45133	1.63544	-0.682938	0.0496869	0.203359	-0.235854
		271	7.08713	7.37869	5.92395	5.40685	3.76254	2.78907	1.78446	-0.506687	0.013104	0.400252	-0.175875
		270	7.84018	8.0073	6.2205	6.01637	4.08679	2.86524	1.68641	-0.54852	-0.178894	0.250646	-0.247054
		269	8.65311	8.75187	6.88617	6.51984	4.5674	3.25946	2.11079	-0.562401	0.0736235	0.343804	-0.0589527
		268	9.31658	9.48228	7.63743	7.24612	5.05091	3.73507	2.32672	-0.52991	0.113328	0.485482	0.0887169
		267	9.82202	9.9872	8.21326	7.63974	5.52171	3.93281	2.35292	-0.507286	0.187454	0.502019	0.0106639
		266	10.1641	10.4194	8.70846	7.92474	5.58348	3.93997	2.40571	-0.627325	-0.143044	0.340111	-0.137019
		265	10.838	10.7295	8.95039	8.27776	6.02411	4.23543	2.52529	-0.478739	0.202334	0.495495	-0.00690416
		264	10.7589	10.8912	8.74885	8.15148	5.82435	4.08886	2.38183	-0.656732	0.0192289	0.279783	-0.152104
		263	10.6448	10.6411	8.72597	7.99475	5.74765	4.05856	2.37198	-0.605702	-0.0714289	0.39412	-0.0962818
		262	10.2569	10.3334	8.40683	7.82469	5.67477	3.82737	2.4909	-0.54659	0.0920023	0.394706	0.0281784
		261	9.601	9.8596	7.96332	7.29257	5.24223	3.70847	2.26242	-0.485061	0.0835587	0.596867	0.172728
		260	9.13261	9.04565	7.31754	6.84526	4.75096	3.28489	2.17975	-0.587714	0.0632228	0.422901	-0.0687575
		259	8.08178	8.14241	6.23164	6.04011	4.2317	2.98501	1.8351	-0.535393	-0.0521372	0.287367	-0.0938581
		258	7.55092	7.39551	5.66576	5.55773	3.89385	2.71427	1.88015	-0.460069	0.14345	0.694332	0.181031
		257	6.26967	6.1597	4.65589	4.50788	2.87475	2.16042	1.53577	-0.670515	-0.0175317	0.404369	-0.309802
		256	5.46851	5.13631	3.80598	3.90732	2.52734	1.82797	1.52529	-0.516846	-0.0553318	0.439552	0.0423297
		255	4.33835	4.12902	2.8515	3.06098	1.69139	1.34177	1.26414	-0.328682	0.242622	0.509589	0.187599
		254	3.33552	3.01273	1.76654	2.29875	1.18993	0.787965	1.05286	-0.451711	0.094003	0.495632	-0.158125
		253	1.93151	1.66789	0.839597	1.14154	0.347855	0.359583	0.683672	-0.523732	0.109358	0.400726	-0.15599
		252	0.611024	0.637062	-0.546849	0.210408	-0.350876	-0.220858	0.375747	-0.820151	0.113731	0.39296	-0.238046
		251	-0.133092	-0.458377	-1.40877	-0.57773	-1.13351	-0.698236	0.228286	-0.686283	-0.103958	0.178268	-0.39089
		250	-1.15279	-1.31451	-2.02436	-1.14144	-1.64587	-0.956333	0.19937	-0.549413	0.0200852	0.341762	-0.389248
		249	-2.01914	-2.29596	-2.94366	-1.68846	-2.02845	-1.37226	-0.0675562	-0.554985	0.150957	0.326035	-0.370859
		248	-2.5864	-2.94468	-3.4293	-2.43561	-2.38931	-1.38036	-0.317332	-0.754127	-0.0406438	0.286643	-0.353689
		247	-2.84242	-3.37447	-3.61951	-2.68697	-2.51674	-1.74693	-0.105039	-0.598193	0.0508882	0.343466	-0.146836
		246	-3.33267	-3.68929	-3.99488	-2.96771	-2.91732	-2.00218	-0.256048	-0.7126	0.0320279	0.132899	-0.589683
		245	-3.67107	-4.01527	-4.33611	-3.07499	-2.89755	-2.02508	-0.365339	-0.639106	-0.0338677	0.266441	-0.362716
		244	-3.64168	-3.85361	-4.17774	-3.00643	-2.95464	-2.02273	-0.185018	-0.63435	0.105361	0.247013	-0.363358
		243	-3.69786	-3.97469	-4.32356	-2.9957	-3.00547	-2.03978	-0.367924	-0.790931	0.0412561	0.17063	-0.328355
		242	-3.50572	-3.63555	-3.94249	-2.68046	-2.65143	-1.62521	-0.0161517	-0.393294	0.200669	0.355785	-0.121694
		241	-3.32307	-3.45389	-3.89768	-2.52375	-2.62646	-1.73252	-0.101671	-0.33234	0.257826	0.337451	-0.354568
		240	-3.07206	-3.36518	-3.71711	-2.48423	-2.54379	-1.51212	0.0362766	-0.576288	0.13233	0.375205	-0.367974
		239	-3.10801	-2.9864	-3.67501	-2.45393	-2.45414	-1.73546	-0.0788852	-0.684031	-0.0854869	0.204752	-0.566519
		238	-2.59184	-2.84167	-3.34401	-2.25217	-2.28695	-1.58453	-0.0609602	-0.815021	-0.00104213	0.115906	-0.764361
		237	-2.55847	-2.54645	-3.11079	-1.84327	-2.10567	-1.12501	0.114593	-0.416924	0.106987	0.202438	-0.53477
		236	-2.27361	-2.33704	-2.98667	-1.99551	-2.04868	-1.33769	0.00709927	-0.81173	-0.209684	0.0443223	-0.779641
		235	-1.9393	-2.04145	-2.49294	-1.50651	-1.66409	-1.12208	0.255327	-0.689926	-0.0736842	0.184104	-0.6773
		234	-1.60002	-1.67519	-2.18235	-1.21042	-1.4885	-0.846427	0.359509	-0.612315	0.017601	0.192162	-0.654435
		233	-1.32004	-1.2482	-2.21241	-0.940145	-1.55025	-0.832157	0.394675	-0.390401	-0.0100451	0.318831	-0.813797
		232	-0.918684	-0.986466	-1.87361	-0.943961	-1.29425	-0.764524	0.529646	-0.575244	-0.0310134	0.142656	-0.774618
		231	-0.877868	-0.838749	-1.63083	-0.593832	-1.05537	-0.652033	0.498154	-0.557398	-0.0369716	0.218526	-0.424039
		230	-0.721523	-0.734154	-1.51922	-0.377802	-1.00713	-0.60287	0.53	-0.735554	0.066279	0.172051	-0.658886
		229	-0.363676	-0.612089	-1.34673	-0.508492	-0.849892	-0.440886	0.702582	-0.540342	0.147291	0.209913	-0.77571
		228	-0.279141	-0.401162	-1.22968	-0.303389	-0.858376	-0.425997	0.705193	-0.511067	0.0609167	0.133963	-0.975432
		227	-0.271569	-0.319901	-1.29825	-0.355555	-0.987543	-0.288952	0.439944	-0.808304	-0.255534	-0.160802	-1.05946
		226	0.0248719	-0.164284	-0.987982	-0.0905726	-0.570609	-0.284774	0.848117	-0.559442	-0.000686556	-0.00928909	-1.1075
		225	0.00298379	-0.216576	-1.18113	-0.106732	-0.795665	-0.342135	0.618892	-0.686603	-0.244295	-0.0372874	-1.24608
		224	0.298782	-0.0447067	-0.992826	0.135052	-0.568018	-0.373183	0.736954	-0.676644	-0.198794	-0.274668	-1.20418
		223	0.322361	0.224317	-0.597209	0.341821	-0.488425	0.0754137	1.01199	-0.569676	0.00169502	-0.3773	-1.46849
		222	0.565126	0.239752	-0.735798	0.318554	-0.358109	-0.187102	0.919149	-0.720359	-0.0225436	-0.428486	-1.46917
		221	0.775923	0.595156	-0.476825	0.265796	-0.177519	0.0549801	0.782931	-0.73611	0.130586	-0.382371	-1.40077
		220	0.831151	0.678013	-0.384054	0.586524	-0.189071	0.0138064	0.94557	-0.57775	0.00412587	-0.194625	-1.80432
		219	1.24979	1.09765	-0.127584	0.926634	0.136963	0.0828737	0.869674	-0.614195	0.0936395	-0.338264	-1.8358
		218	1.22381	1.31397	0.100992	0.958145	0.24266	0.418084	0.942252	-0.667861	-0.0815198	-0.544732	-1.78376
		217	1.62747	1.51407	0.354084	1.05712	0.0868135	0.0692402	1.26072	-0.943236	-0.209108	-0.772495	-1.92061
		216	2.27948	2.39383	0.949603	1.87833	0.498318	0.724803	1.43795	-0.668285	0.0472603	-0.692357	-2.05669
		215	2.86982	2.90316	1.34017	2.08641	1.03529	0.861276	1.41202	-0.564215	-0.276764	-0.659484	-2.01294
		214	3.6069	3.52641	2.02149	2.56179	1.35318	1.166	1.68575	-0.745339	-0.403327	-0.787025	-2.61007
		213	4.03634	4.14768	2.51812	2.97642	1.59795	1.32473	1.4316	-0.945367	-0.736582	-1.47929	-3.0294
		212	4.97325	5.14167	3.36414	3.91115	2.09118	1.69162	1.93191	-0.627653	-0.373935	-1.40137	-3.31628
		211	5.78762	5.64138	3.86342	4.17932	2.56808	2.00757	1.98186	-0.797286	-0.543662	-2.02614	-4.11518
		210	6.54228	6.15048	4.38122	4.70698	3.05654	2.26845	2.01075	-1.03644	-0.74662	-2.28577	-4.90116
		209	6.79703	6.53212	4.63485	5.16345	3.2149	2.42342	2.22261	-1.05758	-1.00786	-2.81183	-5.42928
		208	6.87063	6.83568	4.84105	5.20733	3.27916	2.69988	2.27382	-0.901498	-1.17644	-3.37663	-6.40253
		207	7.16958	6.9282	5.0709	5.4085	3.40827	2.83061	2.44171	-0.872433	-1.31718	-3.88832	-7.59144
		206	6.79022	7.02625	4.65974	5.03617	3.10612	2.38609	1.95901	-1.23841	-1.79315	-4.74154	-8.70937
		205	6.77458	6.37231	4.6549	5.01627	3.00196	2.40186	2.26833	-1.3233	-1.7617	-5.40044	-9.99382
		204	5.85656	6.20853	4.1655	4.61375	2.61051	1.92703	1.92829	-1.2463	-2.3312	-6.16417	-11.4408
		203	5.84458	5.50797	3.87255	3.9559	1.88577	1.86865	1.73338	-1.4377	-2.54303	-7.21972	-12.7143
		202	5.05269	5.04479	2.6856	3.58515	1.88344	1.53526	1.52934	-1.46137	-2.80113	-7.78197	-13.3464
		201	4.35277	3.664	2.13138	2.619	1.28396	1.26835	1.3469	-1.66721	-2.92879	-8.41831	-14.6062
		200	3.53248	3.46361	1.88201	2.34105	0.974195	0.725303	1.56683	-1.50527	-2.89024	-8.87735	-14.9762
		199	3.01789	3.20021	1.10387	2.09759	0.251818	0.755011	1.38821	-1.56098	-2.9466	-8.29979	-15.0284
		198	2.17687	1.92341	0.308516	1.38086	0.179805	0.274463	1.01833	-1.7543	-3.08634	-8.63085	-15.1767
		197	1.42434	1.8249	-0.379701	1.04877	-0.446731	0.0121897	1.11973	-1.05079	-2.70036	-8.34369	-15.1708
		196	-0.467347	0.138182	-1.26002	-0.0134004	-1.05748	-0.0238277	0.76864	-1.74479	-2.77425	-7.81471	-14.3553
		195	0.250072	-0.711042	-1.24364	-0.359417	-0.762748	-0.00867248	1.07353	-0.991161	-3.06267	-6.10866	-13.5838
		194	-0.818993	-0.561896	-5.12874	-1.48578	-1.9304	-0.715965	0.512876	-1.19453	-2.08809	-7.91662	-10.8897
		193	0.418966	1.27409	-4.07219	-2.01077	0.518825	0.55497	3.36359	0.752112	-0.309599	-7.23058	-6.55444
		192	0.866171	-1.96322	6.72134	-1.0612	15.756	-2.23375	3.30698	1.4316	6.1121	6.31941	1.1204
		191	2.7683	2.07123	-0.228828	6.79955	9.00487	-8.74409	-17.415	-5.40274	9.68315	30.2494	10.239
		190	13.3409	23.5341	34.9872	16.5672	36.6273	4.48945	30.8269	-0.407979	25.655	34.6491	29.7703
		189	24.2646	54.0521	11.3067	14.8072	36.3845	21.6674	30.5756	31.8335	52.0504	45.3279	40.3222
		188	-16.5246	18.3261	-12.5361	-59.3111	19.9667	-33.0437	-2.13786	2.17468	19.1097	8.95509	18.8074
		187	29.0497	87.0436	56.0173	57.1428	56.4406	78.7809	55.9807	34.8528	40.6687	53.7803	62.7251
		186	11.9876	93.816	17.7444	2.75951	68.7654	17.9546	31.4956	0.44373	59.1037	48.2174	55.7675
		185	0.0622025	55.6215	19.3123	-27.7361	26.338	-12.4571	41.0301	9.11484	61.6784	49.5384	-11.0939

## Sheet: Figure 5b+SuppFig 16b
Figure 5b and Supplementary Figure 16b
CD titrations of 10 uM T95-2T parallel G4 with sRSM																	ITC analysis
			sRSM concentration (μM)															Molar ratio
		Wavelength (nm)	0	1.25	2.5	3.75	5	7.5	10	15	20	30	40					0.01952	-5174.14
		330	0.061958	-0.0876757	0.11304	-0.139112	-0.297008	0.0786479	-0.863988	-0.231169	-0.413052	0.256353	-0.282386					0.1177	-8829.45
		329	0.09053	0.199066	0.218751	0.0741407	-0.297719	0.273678	-0.663534	-0.321951	-0.272191	0.372035	-0.0623652					0.21683	-9014.74
		328	0.381678	0.280714	0.290353	0.0882836	-0.128005	0.400018	-0.514319	0.174868	-0.192095	0.511158	0.148549					0.31691	-9020.88
		327	0.231937	0.102611	0.278842	-0.0908149	-0.156954	0.289858	-0.787531	-0.105917	-0.2862	0.342574	-0.0373481					0.41794	-9019.66
		326	0.187739	0.0491349	0.221604	-0.0179179	-0.194517	0.137708	-0.717589	-0.227305	-0.432127	0.311819	-0.0431474					0.51993	-9081.44
		325	0.269465	0.119382	0.144488	-0.0109705	-0.186335	0.265693	-0.663101	-0.117274	-0.246062	0.303265	-0.00467182					0.62286	-9103.4
		324	0.24256	0.244829	0.027883	0.0148425	-0.189609	0.37757	-0.600651	0.0247409	-0.117066	0.324782	-0.137392					0.72674	-9261.38
		323	0.171795	0.139455	0.186111	0.0243263	-0.351879	0.273033	-0.759123	-0.186613	-0.285957	0.361231	-0.256179					0.83158	-7713.44
		322	0.234992	0.103534	0.149006	0.0487033	-0.122209	0.239326	-0.688143	-0.0864147	-0.256113	0.20295	-0.0238392					0.93736	-3615.78
		321	0.315904	0.21052	0.248021	-0.036193	0.147786	0.38667	-0.554624	0.0467697	-0.132325	0.45425	-0.0496503					1.0441	-1802.36
		320	0.272939	0.168426	0.217549	0.00640528	-0.0752572	0.21442	-0.817248	-0.14047	-0.0969205	0.256237	0.0207958					1.15179	-1170.14
		319	0.340706	0.157493	0.382409	0.0381216	-0.00565928	0.445162	-0.502887	-0.0967506	-0.0839005	0.43095	0.0927989					1.26043	-852.945
		318	0.153845	0.0349359	0.145574	0.0488728	-0.209684	0.127973	-0.69744	-0.225103	-0.192553	0.252143	-0.14887					1.37002	-639.215
		317	0.324959	0.183031	0.311688	0.0354801	0.00698615	0.354892	-0.636349	-0.0807194	-0.269829	0.265544	-0.0391064					1.48056	-520.942
		316	0.456704	0.264179	0.296585	0.115701	-0.000276285	0.590479	-0.451753	0.116339	-0.133077	0.655021	0.0831235					1.59205	-538.732
		315	0.293294	0.312018	0.283272	0.204453	-0.0262616	0.43409	-0.624715	0.0294239	-0.160765	0.438699	-0.103883					1.70449	-351.557
		314	0.177431	0.0604504	0.0474801	-0.200667	-0.171354	0.110516	-0.804195	-0.332761	-0.421974	0.300088	-0.079521					1.81789	-326.102
		313	0.319825	0.315618	0.260271	0.168444	-0.167058	0.288062	-0.565345	0.00781889	-0.311701	0.267631	-0.169137					1.93223	-264.517
		312	0.252309	0.315152	0.383473	0.0122256	-0.142662	0.33114	-0.678626	-0.0760949	-0.329439	0.355585	-0.0630206					2.04752	-380.406
		311	0.491118	0.417533	0.563202	0.111754	0.0134395	0.36616	-0.548153	-0.136283	-0.111362	0.557786	0.138029
		310	0.570518	0.382701	0.432523	0.351805	-0.0688577	0.410385	-0.598506	-0.0244978	-0.120591	0.307291	0.104268
		309	0.702728	0.642159	0.624226	0.338614	0.0764751	0.581071	-0.411812	0.157975	-0.0864832	0.450192	0.0736066
		308	0.933307	0.679897	0.816283	0.518866	0.265665	0.683455	-0.528274	0.113433	-0.0286355	0.505641	0.190839
		307	1.25451	0.992831	0.948188	0.662787	0.370927	0.828422	-0.3638	0.239522	0.147587	0.606441	0.269303
		306	1.33578	1.09922	1.14592	0.575101	0.504658	0.657453	-0.585656	0.0881321	-0.157176	0.415882	0.0880033
		305	1.58014	1.32508	1.27361	0.92054	0.556875	0.850628	-0.449988	-0.00436211	0.174346	0.505311	0.143771
		304	2.15127	1.95495	1.80395	1.37415	0.905991	1.15797	-0.245903	0.452389	0.342989	0.864206	0.419239
		303	2.66782	2.2053	2.02924	1.40717	1.03111	1.10615	-0.147158	0.315034	0.150471	0.70915	0.423335
		302	3.1761	2.61554	2.2558	1.79622	1.41367	1.36173	-0.182588	0.338263	0.256894	0.913085	0.427651
		301	3.77607	3.20411	2.68758	2.06577	1.66724	1.43204	0.0209708	0.426437	0.223145	0.71422	0.448508
		300	4.3128	3.74373	3.0884	2.42282	2.06918	1.74272	0.075736	0.536384	0.422985	0.858104	0.721911
		299	4.85131	3.96873	3.4948	2.80352	2.34341	1.788	0.151213	0.534042	0.516357	1.03261	0.622549
		298	5.04953	4.35174	3.68148	2.89116	2.45841	1.95693	-0.0005879	0.541191	0.400899	0.928463	0.596537
		297	5.67362	4.72772	3.84554	3.15969	2.50817	1.98652	-0.00558509	0.524564	0.331415	0.939298	0.608768
		296	6.00848	5.22928	4.35797	3.42767	2.92706	2.28753	0.25	0.65241	0.649609	1.138	0.542271
		295	6.31973	5.37591	4.57476	3.58641	3.00583	2.31688	0.167459	0.677732	0.499765	1.10983	0.814819
		294	6.69956	5.55315	4.98795	3.95256	3.19065	2.4808	0.295967	0.681961	0.515404	1.15352	0.828444
		293	6.94864	5.99866	5.09028	3.97306	3.45423	2.52126	0.154349	0.602779	0.605137	1.14225	0.900637
		292	7.33988	6.17177	5.17356	4.25284	3.47785	2.67596	0.243081	0.839379	0.618129	1.27863	0.816691
		291	7.49763	6.35285	5.38603	4.42057	3.64865	2.6295	0.406825	0.72286	0.59448	1.16716	1.01261
		290	7.39796	6.13183	5.16482	4.13565	3.54919	2.54023	0.180886	0.507217	0.397438	0.90914	0.711012
		289	7.61269	6.60312	5.50925	4.36084	3.75326	2.68652	0.245939	0.614272	0.640879	1.11844	0.773998
		288	7.86923	6.67102	5.64555	4.53485	3.90349	2.75465	0.340669	0.752855	0.676856	1.22244	0.794515
		287	7.78139	6.6944	5.65484	4.44956	3.86987	2.82806	0.338963	0.675093	0.560408	1.39242	0.838633
		286	7.87011	6.57518	5.66248	4.54021	3.77782	2.6628	0.333779	0.568104	0.599697	1.20082	0.940098
		285	7.52304	6.57718	5.60087	4.37489	3.68775	2.77974	0.241862	0.695887	0.694855	1.16586	0.929682
		284	7.50832	6.3865	5.4485	4.24621	3.51046	2.55191	0.183815	0.62445	0.601338	1.06821	0.714034
		283	7.12773	6.08978	5.202	4.21758	3.48303	2.48179	0.185335	0.500251	0.615804	1.10336	0.825523
		282	6.96808	5.89814	5.01842	3.88616	3.3787	2.52777	0.289734	0.622353	0.456591	1.2492	0.705161
		281	6.67578	5.70856	4.83768	3.87574	3.12304	2.40666	0.189612	0.472523	0.425074	1.02006	0.814252
		280	6.33978	5.40354	4.64167	3.60565	3.04985	2.26514	0.228342	0.505647	0.365204	1.13921	0.685288
		279	6.01027	5.23209	4.39491	3.41894	2.86133	2.22	0.0962476	0.5255	0.592694	1.04384	0.691116
		278	5.87374	5.05279	4.43897	3.47345	3.02775	2.0908	0.221168	0.619549	0.476693	1.16753	0.686612
		277	5.77401	4.92046	4.15383	3.32379	2.6208	2.2066	-0.0491893	0.572505	0.453352	0.790172	0.593861
		276	5.58248	4.73955	4.07213	3.17667	2.5936	2.07456	0.0454755	0.511338	0.417701	1.02615	0.81237
		275	5.64293	4.82861	4.20744	3.13927	2.56787	2.0488	0.0484002	0.604068	0.349245	0.986961	0.609604
		274	5.64492	4.91548	4.13159	3.32518	2.61509	2.08308	0.0557336	0.590714	0.587516	1.08998	0.750197
		273	5.55154	4.61485	4.02947	3.28262	2.70999	1.96865	0.0716604	0.481995	0.368988	1.08954	0.750504
		272	5.33321	4.56058	3.9859	3.20937	2.53939	1.99545	0.143675	0.603255	0.38965	0.93924	0.608042
		271	5.19043	4.43062	3.9068	2.91702	2.45276	1.97175	-0.0244449	0.39428	0.335566	0.971031	0.555974
		270	5.36746	4.52366	3.79657	3.06214	2.49533	1.89971	0.089825	0.545631	0.457833	1.13575	0.638225
		269	5.11342	4.27962	3.73338	2.99695	2.50066	1.87641	0.0174316	0.593086	0.544663	1.12918	0.55663
		268	5.05587	4.40297	3.71988	2.97267	2.45771	1.8073	0.0175988	0.583919	0.51123	0.9732	0.773455
		267	4.83846	4.05634	3.40446	2.63836	2.30824	1.87892	-0.174914	0.443383	0.325716	1.05079	0.601411
		266	4.41785	3.72799	3.28253	2.34643	2.09421	1.61316	-0.101004	0.41562	0.354002	0.959115	0.668309
		265	4.31316	3.3778	3.02872	2.47439	1.9657	1.55757	-0.0428996	0.556276	0.469496	1.01703	0.574455
		264	3.61005	2.80628	2.61724	2.02933	1.58082	1.454	-0.104883	0.294075	0.20164	0.956831	0.542712
		263	3.24463	2.59735	2.3922	1.81197	1.53285	1.27282	-0.12555	0.275452	0.448576	0.896192	0.673025
		262	2.70534	2.2546	2.03158	1.60985	1.165	1.33106	-0.0451325	0.542719	0.524167	1.07582	0.90735
		261	1.64898	1.3825	1.51613	0.91657	0.649842	0.873227	-0.417272	0.351051	0.104752	0.655238	0.372343
		260	1.50414	1.32055	1.23065	0.838572	0.482545	0.849713	-0.184344	0.516534	0.440433	0.871615	0.692618
		259	0.891339	0.822441	1.12434	0.540639	0.357353	0.821813	-0.23462	0.478053	0.426395	0.943892	0.556441
		258	0.254538	0.0901577	0.491487	0.105576	-0.082551	0.263559	-0.415336	0.174286	0.0115764	0.709234	0.470994
		257	0.0225889	0.0591419	0.0839834	0.210548	-0.121068	0.473237	-0.388046	0.292787	0.164849	0.885624	0.495366
		256	-0.419251	-0.490308	-0.107403	-0.134937	-0.292552	0.185125	-0.423932	0.149861	0.0995102	0.840693	0.329131
		255	-0.542511	-0.433018	-0.336688	-0.394147	-0.229865	0.122714	-0.405492	0.227045	0.100439	0.742199	0.395406
		254	-0.811218	-0.796644	-0.349062	-0.416082	-0.59644	0.134699	-0.428629	0.440416	0.190824	0.945674	0.466948
		253	-1.02752	-0.862712	-0.529167	-0.445161	-0.556673	0.0360279	-0.573134	0.236839	0.222499	0.879008	0.358253
		252	-1.29862	-1.33492	-0.703235	-0.815771	-0.737399	-0.0559476	-0.673472	-0.00516335	-0.13431	0.48268	0.270392
		251	-1.11706	-0.898534	-0.683359	-0.535929	-0.691612	0.105715	-0.388909	0.278639	0.176398	0.882334	0.400757
		250	-1.35602	-1.35575	-0.694171	-0.8261	-0.832466	-0.104825	-0.586557	0.16838	0.0813066	0.668521	0.268873
		249	-1.70633	-1.06078	-0.637616	-0.538148	-0.881637	0.171623	-0.412455	0.358419	0.13423	0.741119	0.460387
		248	-1.50429	-1.12014	-0.963803	-0.838114	-0.96448	-0.0523424	-0.544774	0.0541003	0.0470414	0.64549	0.247086
		247	-1.66798	-1.47005	-0.940657	-0.87173	-0.894896	-0.090638	-0.557374	0.118547	0.0894158	0.508974	0.240328
		246	-1.8341	-1.43586	-0.772431	-1.06277	-0.897191	-0.23001	-0.68831	0.165373	0.0350866	0.738499	0.25189
		245	-1.83191	-1.55156	-0.982901	-1.05724	-1.00995	-0.230041	-0.800036	-0.00690269	-0.243283	0.428219	0.228423
		244	-1.82331	-1.62364	-1.12775	-0.974105	-1.123	-0.408537	-0.890292	-0.101799	-0.140565	0.537497	-0.132745
		243	-1.9101	-1.46755	-0.830507	-1.00921	-0.912306	-0.319759	-0.600354	0.0429513	-0.110816	0.562845	0.145989
		242	-1.80129	-1.57708	-0.981674	-0.806488	-1.05643	-0.161822	-0.596409	0.0427818	0.0173091	0.436487	-0.0328298
		241	-1.84527	-1.59807	-0.871677	-0.784801	-1.07019	-0.186565	-0.632722	-0.0462168	-0.138775	0.44968	-0.0594734
		240	-1.91358	-1.54242	-1.11471	-0.93754	-1.01929	-0.137947	-0.699668	0.0349882	-0.0669885	0.41617	-0.109324
		239	-1.90385	-1.33584	-0.724813	-0.806328	-1.02262	-0.000797033	-0.565169	0.194606	-0.234576	0.464346	-0.0444125
		238	-1.82299	-1.37352	-0.739535	-0.783132	-0.824902	-0.199562	-0.82288	0.0297231	-0.18091	0.415207	-0.190227
		237	-1.4523	-1.40693	-0.878844	-0.834114	-0.817352	-0.0828046	-0.846775	0.0581155	-0.17659	0.210306	-0.262459
		236	-1.50951	-1.24184	-0.658899	-0.853091	-0.980407	-0.0913773	-0.734491	0.17905	-0.239627	0.367453	-0.167259
		235	-1.23023	-1.11348	-0.525753	-0.597148	-0.82081	-0.219493	-0.801837	0.0408786	-0.24137	0.389711	-0.244606
		234	-1.12724	-0.794736	-0.503902	-0.702958	-0.775662	0.0539125	-0.615515	-0.0564663	-0.186755	0.160051	-0.244232
		233	-1.09909	-0.869413	-0.573015	-0.50259	-0.586561	-0.0808673	-0.771698	0.104491	-0.274673	0.236962	-0.332505
		232	-0.744342	-0.453197	-0.16573	-0.425329	-0.659381	0.240371	-0.565402	0.164617	0.0197781	0.425029	0.0584364
		231	-0.65169	-0.407957	0.181063	-0.271414	-0.454985	0.297821	-0.817094	0.0114039	-0.210003	0.163511	-0.344079
		230	-0.151787	-0.126356	0.099827	-0.212715	-0.545263	0.239669	-0.751773	0.0068955	-0.247238	0.27987	-0.37581
		229	0.022212	0.288121	0.218535	0.151051	-0.244041	0.438592	-0.61877	0.15845	-0.1159	0.294203	-0.493368
		228	0.334215	0.120451	0.487394	0.0295899	-0.165276	0.295543	-0.742062	-0.113411	-0.405601	0.190368	-0.532217
		227	1.05707	0.888238	1.14423	0.647043	0.275845	0.842216	-0.416195	0.196311	-0.0662207	0.399468	-0.432374
		226	1.29355	1.33776	1.20677	0.946598	0.479907	0.899723	-0.409788	0.164234	-0.0027821	0.321423	-0.592257
		225	1.73757	1.50341	1.49279	1.05504	0.553046	0.86294	-0.653261	0.0381322	-0.207502	-0.133366	-0.816233
		224	2.1158	2.01613	1.63836	1.07874	0.681116	0.987084	-0.394018	0.0804301	-0.265888	0.0554015	-0.962125
		223	2.56382	2.18771	1.97887	1.30664	0.769438	1.01228	-0.677201	0.0511618	-0.456506	-0.157063	-0.9842
		222	2.83837	2.50512	2.53175	1.62707	0.98871	1.09558	-0.573118	-0.0420766	-0.237934	-0.261835	-1.14377
		221	3.74711	3.21753	2.91816	1.85863	1.63897	1.5455	-0.284057	0.247333	-0.00326223	-0.0434813	-1.18642
		220	3.93587	3.35282	3.05405	2.35856	1.62117	1.4076	-0.620601	0.165689	-0.354037	-0.394116	-1.1751
		219	4.29544	3.72134	3.37709	2.42858	1.78687	1.74546	-0.575507	0.14061	-0.501306	-0.333158	-1.3189
		218	4.97439	4.23593	4.05476	2.90907	2.24412	1.79118	-0.221465	0.287425	-0.321423	-0.202624	-1.27698
		217	5.43046	4.64228	3.90542	2.79661	2.20816	1.71622	-0.305949	-0.0310842	-0.462363	-0.286048	-1.37543
		216	6.14716	4.93858	4.46661	3.37565	2.71342	2.34081	-0.0299921	0.176635	-0.0578378	-0.0833446	-1.48455
		215	6.23463	5.41722	4.56493	3.44708	2.79515	2.15637	-0.309744	0.0859118	-0.45408	-0.376915	-1.86295
		214	6.88932	5.86047	5.30003	3.98103	3.24819	2.40244	-0.299775	0.447604	-0.359839	-0.522478	-2.02296
		213	7.36753	6.55837	5.5404	4.28999	3.3961	2.36758	-0.259837	0.108849	-0.453145	-0.745795	-2.36238
		212	7.96594	6.90699	5.9173	4.4455	3.5507	2.51959	-0.144706	-0.0727359	-0.935829	-1.05163	-2.94778
		211	8.82966	7.34813	6.43568	4.73819	3.70622	2.63288	-0.0861157	0.0511974	-0.661538	-1.66326	-3.43147
		210	9.09459	7.71464	6.55639	4.75156	3.97594	2.56355	-0.317696	-0.188984	-1.36193	-2.05298	-4.3014
		209	9.76453	8.09732	6.87188	5.03979	3.79454	2.68673	-0.501494	-0.438831	-1.84875	-3.06239	-5.53229
		208	9.80119	8.07798	6.75609	5.00257	3.88105	2.70278	-0.425706	-0.748003	-2.27336	-3.59964	-6.94911
		207	9.88197	8.40652	7.01195	5.10567	3.88436	2.53185	-0.449508	-0.829159	-2.66183	-4.55748	-8.12525
		206	9.93786	8.53073	7.00181	4.94169	3.4924	2.2374	-0.589336	-1.2461	-3.26248	-5.82118	-9.71856
		205	9.45325	8.2211	6.79669	4.64142	3.34351	2.10009	-0.996445	-1.43904	-3.75714	-6.66067	-11.1345
		204	9.41768	8.03662	6.50076	4.18093	3.29251	1.95743	-1.10011	-1.74363	-4.22134	-7.75966	-12.0155
		203	9.19193	7.61233	6.24318	4.20957	3.11384	1.7678	-0.912313	-1.86427	-4.46573	-8.63481	-13.4664
		202	7.84682	6.54443	5.43242	3.38713	2.1964	1.27441	-1.36681	-2.25868	-5.39071	-9.46846	-14.7106
		201	7.25567	5.80278	4.7073	2.687	1.59004	0.792186	-1.38969	-2.57375	-5.74979	-10.0263	-15.4208
		200	5.33313	4.53387	3.2969	1.55214	0.922811	0.110789	-1.91377	-3.01052	-6.57143	-11.4618	-16.132
		199	4.09357	3.52067	3.17688	1.33897	0.331807	-0.186315	-1.83855	-2.82844	-6.0134	-10.5333	-15.5815
		198	2.56863	2.5845	1.70349	0.830132	-0.452564	-0.516014	-2.09555	-2.94403	-6.30952	-10.666	-14.753
		197	2.48325	2.45434	1.9396	0.647244	-0.176999	0.203195	-1.54582	-2.68401	-5.59042	-9.54412	-11.5624
		196	1.81615	1.71526	1.37035	0.683228	-0.131299	-0.25665	-1.64055	-2.39347	-5.29608	-9.29897	-9.47971
		195	2.0396	2.26736	1.87248	0.844518	-0.0651802	0.285328	-1.80764	-2.54276	-4.94056	-7.16136	-3.0084
		194	2.17154	2.57815	3.21838	3.36729	0.659483	0.819229	-1.2602	-1.27728	-3.5087	-2.20922	0.220404
		193	1.96147	0.942165	2.82003	2.66943	1.05519	0.205842	-0.627889	0.199719	-2.79365	0.315123	3.29881
		192	10.2713	8.99637	11.6001	5.17724	6.69189	1.86515	5.3318	3.11136	16.6166	17.1572	4.06948
		191	7.09193	12.0547	21.5827	2.25052	9.22488	3.12624	8.10737	20.844	14.2047	13.7137	2.23814
		190	-39.4925	-3.67782	17.2055	-15.5034	-5.9383	-11.1857	-0.0924517	19.6392	-3.97684	0.31942	-15.4406
		189	20.3118	6.00552	34.2463	10.2293	23.859	18.6974	17.8647	32.1771	20.7434	9.94713	7.58155
		188	35.6537	-6.03798	48.6955	4.30995	4.10468	16.7534	29.3601	27.9872	13.9854	14.5658	2.65839
		187	13.4962	-4.91105	6.8161	-22.6626	-14.8655	-10.6601	12.4026	9.9449	-8.21138	-14.0542	-20.9866
		186	33.8966	24.1324	74.6157	14.4552	18.6633	31.7425	73.3081	45.7227	19.3598	23.6246	13.6699
		185	46.5318	50.4832	98.2125	25.387	22.5133	36.7536	56.8415	36.1624	31.9521	25.821	22.4035

## Sheet: Figure 6a
Figure 6a
CD titrations of 10 uM T95-2T parallel G4 with sRSM
			sRSM concentration (μM)
		Wavelength (nm)	0	0.31	0.63	0.94	1.25	1.75	2.5	3	3.75	4.375	5	6	6.4	6.75	7	9	10	15	20	30	40
		300	-0.14012	-0.42002	-0.55099	-0.53467	-0.37107	-0.33716	-0.53259	-0.51966	-0.56491	-0.60962	-0.60869	-1.09258	-0.92766	-0.60252	-0.92279	-0.77216	-0.2886	-0.85293	-0.93923	-0.93039	-0.84076
		299	-0.01824	-0.48281	-0.42865	-0.47135	-0.43935	-0.34454	-0.60519	-0.53234	-0.62099	-0.71691	-0.61949	-0.9199	-0.79059	-0.51218	-0.87921	-0.6762	-0.25288	-0.71639	-1.00001	-0.78627	-0.86384
		298	-0.29401	-0.63695	-0.77352	-0.74399	-0.7074	-0.63905	-0.7697	-0.79207	-0.8869	-0.92918	-0.73645	-0.9647	-1.06536	-0.75164	-1.11033	-0.99372	-0.5063	-0.93612	-1.30244	-1.15842	-0.99892
		297	-0.34662	-0.65681	-0.80182	-0.70394	-0.77052	-0.70205	-0.85407	-0.75957	-0.7374	-0.7613	-0.79555	-1.16213	-1.09198	-0.72989	-1.20035	-0.86495	-0.61514	-0.88673	-1.19812	-1.06441	-1.05826
		296	-0.26043	-0.75045	-0.7302	-0.8797	-0.75971	-0.69053	-0.75607	-0.77158	-0.77099	-0.89673	-0.68859	-1.0483	-1.08366	-0.48471	-0.97537	-0.7669	-0.41243	-0.7978	-1.1278	-1.02065	-1.01534
		295	-0.392	-0.67125	-0.69175	-0.74908	-0.64941	-0.6854	-0.69311	-0.77746	-0.83374	-0.87325	-0.74207	-1.01056	-0.89044	-0.62141	-1.03829	-0.74822	-0.41414	-0.84343	-1.11691	-0.90051	-1.03363
		294	-0.32451	-0.68536	-0.65886	-0.8504	-0.68218	-0.69453	-0.84838	-0.76171	-0.61871	-0.77815	-0.59911	-1.02576	-0.99115	-0.49202	-0.80124	-0.8072	-0.29609	-0.81984	-1.0541	-0.94624	-1.03308
		293	-0.28002	-0.55148	-0.67334	-0.75265	-0.81932	-0.53507	-0.80264	-0.66819	-0.78044	-0.70748	-0.67588	-0.79724	-0.83064	-0.35736	-0.94	-0.65646	-0.17806	-0.6562	-0.97072	-0.82438	-0.82896
		292	-0.53007	-0.74359	-0.67052	-0.86753	-0.92434	-0.75825	-0.92626	-0.76854	-0.88748	-0.74282	-0.72354	-0.96512	-0.85751	-0.5177	-1.10285	-0.68402	-0.2733	-0.65357	-1.17701	-0.9756	-0.92441
		291	-0.47643	-0.65267	-0.69096	-0.82505	-0.65577	-0.60215	-0.74427	-0.49619	-0.63297	-0.68372	-0.57172	-0.82221	-0.77599	-0.35102	-0.80612	-0.61089	-0.01747	-0.59913	-0.83359	-0.64297	-0.77164
		290	-0.45023	-0.5223	-0.77934	-0.73501	-0.70048	-0.65158	-0.7165	-0.67835	-0.63236	-0.67357	-0.49093	-0.87809	-0.79214	-0.48426	-0.70826	-0.63995	-0.20277	-0.73099	-0.85973	-0.72679	-0.76513
		289	-0.12779	-0.47722	-0.56583	-0.57531	-0.68315	-0.46215	-0.54286	-0.47701	-0.59	-0.53521	-0.40175	-0.76392	-0.66182	-0.1812	-0.60072	-0.5491	0.001806	-0.62227	-0.78634	-0.76077	-0.72092
		288	-0.21308	-0.4915	-0.46401	-0.50637	-0.5883	-0.31604	-0.47721	-0.45414	-0.48895	-0.60168	-0.41999	-0.70024	-0.68006	-0.2948	-0.6977	-0.46658	0.019544	-0.49354	-0.8212	-0.59316	-0.66579
		287	-0.36731	-0.4475	-0.47857	-0.6621	-0.50958	-0.47438	-0.41055	-0.33206	-0.50132	-0.53229	-0.41349	-0.77053	-0.64542	-0.41526	-0.78912	-0.57178	-0.22467	-0.71196	-0.94894	-0.75167	-0.83069
		286	-0.12989	-0.25353	-0.29441	-0.34516	-0.35231	-0.23059	-0.24955	-0.14468	-0.24242	-0.39575	-0.24766	-0.62325	-0.54027	-0.15459	-0.67006	-0.35331	0.050864	-0.60485	-0.75118	-0.45112	-0.61696
		285	0.121327	-0.21335	-0.27438	-0.09495	-0.2941	-0.08702	-0.22121	-0.17447	-0.11476	-0.45203	-0.08086	-0.48206	-0.55096	-0.1236	-0.44265	-0.45171	0.04013	-0.41367	-0.6647	-0.46753	-0.56354
		284	0.258988	0.077871	-0.01517	-0.02862	0.03088	0.006291	0.033737	0.166146	0.026647	-0.12187	-0.07163	-0.29555	-0.28752	0.085739	-0.35605	-0.15979	0.089805	-0.40034	-0.57047	-0.35763	-0.55203
		283	0.284996	0.236864	0.060954	-0.06253	0.052241	0.212474	-0.03672	0.140466	0.13184	-0.16654	-0.08168	-0.30833	-0.24783	-0.05618	-0.43604	-0.26186	0.047398	-0.39722	-0.59039	-0.32758	-0.55127
		282	0.518899	0.535583	0.270323	0.329349	0.323881	0.446534	0.313354	0.355405	0.295429	0.154175	0.190586	-0.26314	-0.15725	0.099701	-0.29859	-0.17851	0.176358	-0.27386	-0.52668	-0.11191	-0.26787
		281	0.785111	0.939784	0.743566	0.586388	0.634939	0.814394	0.579359	0.608795	0.540283	0.535721	0.394765	0.035066	0.1314	0.311919	-0.0381	-0.08293	0.423857	-0.19306	-0.23581	-0.08802	-0.04886
		280	0.874768	1.05456	0.937724	0.775337	0.787515	0.826831	0.889797	0.831733	0.657717	0.378178	0.582191	-0.02828	0.164775	0.19186	-0.17533	-0.08134	0.294706	-0.24429	-0.41238	-0.08202	-0.28937
		279	1.4858	1.50598	1.3207	1.27095	1.37602	1.45408	1.25172	1.09633	1.05986	0.823599	0.730646	0.305956	0.184914	0.357341	-0.09181	0.09154	0.593446	-0.1584	-0.24371	0.074996	-0.08195
		278	2.05175	2.06232	1.98698	1.82034	1.77449	1.84911	1.74239	1.42443	1.54767	0.990718	1.00101	0.567609	0.558141	0.747203	0.180869	0.223627	0.558127	0.014082	-0.05567	0.225612	0.156459
		277	2.56813	2.41609	2.27293	2.25314	2.21021	2.16357	2.08933	1.76918	1.69218	1.2261	1.24955	0.536072	0.460921	0.681461	0.129261	0.114004	0.655722	-0.14814	-0.22189	0.326417	0.043904
		276	3.11215	3.13078	3.13634	2.8413	2.7703	2.63884	2.67066	2.31358	2.11027	1.45653	1.54047	0.584671	0.626429	0.900528	0.210128	0.247351	0.552798	-0.05702	-0.09162	0.386711	0.140995
		275	3.56719	3.71035	3.5102	3.4484	3.31479	3.05091	3.05779	2.56989	2.53222	1.83101	1.68924	0.778313	0.739373	0.927139	0.243114	0.231491	0.601462	0.007683	-0.04427	0.13581	0.346958
		274	4.35474	4.21375	4.16638	4.00305	3.8957	3.88668	3.4013	3.00079	2.79186	2.10856	2.14789	1.05688	0.830177	1.05719	0.25884	0.352086	0.633499	-0.03218	0.022626	0.43354	0.442538
		273	4.75579	4.86104	4.64098	4.64988	4.34059	4.26878	3.81631	3.3898	3.2664	2.20736	2.16466	1.08564	0.977332	1.18325	0.313647	0.112806	0.564322	-0.06086	-0.08371	0.389714	0.358699
		272	5.63009	5.54704	5.47127	5.29545	5.11016	4.81068	4.56376	3.70474	3.59112	2.57672	2.56391	1.36592	1.10824	1.15277	0.321063	0.130814	0.566866	0.008812	0.019826	0.599514	0.376994
		271	6.47613	6.3457	6.20718	5.92769	5.6148	5.55381	4.99992	4.12013	4.08208	3.02917	2.71987	1.53814	1.2326	1.40398	0.413856	0.255614	0.69196	0.160148	0.074138	0.568891	0.540931
		270	6.88102	6.77501	6.66521	6.4714	6.11391	5.98891	5.40993	4.41483	4.30141	3.05894	2.83184	1.54888	1.23202	1.22523	0.310678	0.149356	0.500845	-0.0266	-0.12092	0.284024	0.487041
		269	7.8377	7.54753	7.34868	7.18755	6.86193	6.43288	5.90088	4.8615	4.70327	3.44165	3.12112	1.73637	1.34651	1.39256	0.452643	0.185851	0.553615	-0.04069	-0.08103	0.524868	0.6868
		268	8.3946	8.22043	7.9935	7.79501	7.27899	7.04208	6.30622	5.08949	5.13955	3.52128	3.28705	1.66719	1.36112	1.26565	0.463907	0.000473	0.408307	-0.09804	-0.11886	0.442423	0.660288
		267	9.11105	8.80939	8.65919	8.4363	7.89573	7.43166	6.84919	5.38903	5.31187	3.68082	3.19441	1.71814	1.38348	1.34292	0.196893	0.075972	0.384257	-0.1041	-0.30914	0.344273	0.610112
		266	9.59134	9.34161	9.01293	8.90548	8.16279	7.68197	7.08103	5.69094	5.46839	3.70495	3.32643	1.6206	1.29168	1.36042	0.273361	-0.03841	0.145851	-0.16149	-0.35126	0.325345	0.557205
		265	9.88467	9.6659	9.32839	9.20927	8.41605	8.03756	7.09111	5.65372	5.60655	3.78463	3.34866	1.54036	1.19465	1.17538	-0.06779	-0.2316	0.105324	-0.33413	-0.55013	0.328479	0.428679
		264	10.22	9.86184	9.62032	9.39303	8.5682	8.09142	7.29922	5.75002	5.51618	3.8133	3.30637	1.52136	1.03144	1.15139	-0.0684	-0.36719	0.071262	-0.39054	-0.48837	0.045702	0.39158
		263	9.96882	9.50851	9.18374	9.1563	8.30388	7.84117	6.92782	5.45755	5.11124	3.63272	2.99104	1.16607	0.809001	0.882759	-0.21818	-0.5128	-0.3086	-0.64444	-0.86491	-0.08096	-0.01718
		262	9.80452	9.29048	9.07769	8.89257	8.02289	7.47226	6.59157	5.13046	4.90478	3.18319	2.75337	1.05936	0.606771	0.884177	-0.429	-0.57125	-0.37839	-0.82678	-0.81675	-0.16751	0.070933
		261	9.15307	8.74617	8.53898	8.51259	7.51117	6.9696	6.00539	4.65812	4.36003	2.73986	2.34578	0.734233	0.351405	0.452938	-0.47621	-0.73921	-0.43137	-0.93367	-1.05505	-0.3172	-0.15552
		260	8.34587	8.13093	7.72502	7.55873	6.62307	6.14785	5.30505	3.9601	3.80209	2.28961	1.98013	0.350082	0.035142	0.333231	-0.79768	-0.94271	-0.62032	-1.20671	-1.08106	-0.65189	-0.40077
		259	7.74039	7.38068	6.9881	6.83743	5.86989	5.44011	4.69915	3.50046	3.21977	1.88072	1.6345	0.192274	-0.22847	0.060426	-0.84686	-1.03275	-0.71344	-1.18278	-1.13901	-0.64701	-0.52179
		258	6.76774	6.53801	6.17186	5.93425	5.24523	4.69351	3.89772	2.93458	2.53212	1.39486	1.24952	-0.18714	-0.44003	-0.17515	-1.21503	-1.06134	-0.8267	-1.31638	-1.38169	-0.84966	-0.59126
		257	5.93347	5.39323	5.14804	5.10254	4.16959	3.7662	3.06064	2.09671	1.88235	0.92153	0.814191	-0.48445	-0.76098	-0.30973	-1.15271	-1.33051	-0.84024	-1.35799	-1.60315	-1.03233	-1.01818
		256	4.83047	4.59084	4.11603	4.23735	3.2445	2.86537	2.20568	1.44576	1.27446	0.314184	0.249334	-0.84622	-0.89766	-0.61557	-1.38765	-1.23563	-1.06842	-1.46939	-1.5619	-1.0716	-1.19727
		255	3.87608	3.48123	3.05945	3.16769	2.29888	1.90212	1.40328	0.627839	0.538941	-0.2188	-0.32926	-1.05486	-1.19904	-0.81814	-1.61419	-1.35978	-1.13496	-1.55127	-1.63865	-1.3896	-1.38631
		254	2.81704	2.59196	2.12007	2.18316	1.38743	1.14097	0.569762	0.128004	0.038969	-0.62514	-0.51279	-1.23841	-1.30361	-0.9316	-1.7409	-1.43608	-1.01409	-1.50977	-1.63429	-1.4583	-1.36029
		253	1.6871	1.29655	0.834126	0.988708	0.149392	0.093073	-0.49719	-0.67269	-0.72833	-1.21743	-1.12314	-1.78581	-1.76531	-1.3881	-1.82019	-1.58958	-1.41908	-1.70678	-1.89	-1.6256	-1.59972
		252	0.411395	0.180581	-0.22673	-0.21418	-0.94041	-0.88808	-1.22692	-1.354	-1.58818	-1.84917	-1.59412	-1.96393	-2.02168	-1.52253	-2.0141	-1.59798	-1.46699	-1.87006	-1.83167	-1.79338	-1.86764
		251	-0.48609	-0.71046	-0.9705	-0.82921	-1.56493	-1.54729	-1.78869	-1.81437	-2.21792	-2.04177	-1.81923	-2.25856	-2.10211	-1.5656	-1.91824	-1.5963	-1.31474	-1.60164	-1.91076	-1.76305	-1.81444
		250	-1.43277	-1.63183	-2.05329	-1.81703	-2.37582	-2.27836	-2.69115	-2.35117	-2.63138	-2.41273	-2.1823	-2.44655	-2.18147	-1.66504	-2.13131	-1.57017	-1.33951	-1.80409	-1.94735	-1.85879	-1.91986
		249	-2.26399	-2.3294	-2.82414	-2.61186	-3.15169	-3.07351	-3.12728	-2.91025	-3.02155	-2.8731	-2.58233	-2.66347	-2.38507	-1.74555	-2.20701	-1.57564	-1.34967	-1.86385	-2.01763	-1.89365	-2.04176
		248	-2.77706	-2.81185	-3.23613	-3.10922	-3.46045	-3.30154	-3.59994	-3.19766	-3.408	-2.70848	-2.55227	-2.41453	-2.36045	-1.69264	-1.86332	-1.44774	-1.14612	-1.74691	-1.91443	-1.88681	-2.07541
		247	-3.34742	-3.37545	-3.7531	-3.58209	-3.99533	-3.80286	-3.94224	-3.44549	-3.59193	-3.1225	-2.80457	-2.62968	-2.30234	-1.78388	-2.20424	-1.56262	-1.28868	-1.67186	-1.82191	-1.81316	-2.1525
		246	-3.79932	-3.79505	-4.17404	-3.92631	-4.3369	-4.02607	-4.28355	-3.58	-3.76101	-3.36155	-2.8968	-2.87217	-2.43663	-1.85817	-2.02579	-1.50492	-1.20177	-1.73037	-1.8747	-1.79414	-2.12562
		245	-4.00444	-3.95992	-4.20339	-4.06786	-4.46093	-4.05069	-4.33393	-3.75431	-3.83898	-3.20597	-2.79675	-2.61508	-2.29845	-1.8122	-2.09862	-1.38503	-0.97365	-1.68594	-1.73347	-1.82225	-2.09341
		244	-4.08512	-4.0238	-4.61456	-4.14677	-4.623	-4.08388	-4.47782	-3.65829	-3.70998	-3.18447	-2.76884	-2.67773	-2.37823	-1.84774	-1.85497	-1.27379	-1.05019	-1.51053	-1.9295	-1.74448	-2.01902
		243	-4.3482	-4.32951	-4.74047	-4.24387	-4.60899	-4.30366	-4.37791	-3.77926	-3.76234	-3.266	-2.89513	-2.59393	-2.20839	-1.67757	-1.95734	-1.28111	-1.19722	-1.60336	-1.69809	-1.86843	-2.31878
		242	-4.30033	-4.05683	-4.37829	-4.13649	-4.36141	-4.20157	-4.1651	-3.55558	-3.65047	-3.19343	-2.56641	-2.42149	-2.10271	-1.51051	-1.75016	-1.27357	-0.78114	-1.50835	-1.57303	-1.65914	-2.1247
		241	-4.02236	-3.93208	-4.42587	-4.07177	-4.28666	-4.04576	-4.00443	-3.37068	-3.38494	-2.89651	-2.51755	-2.26047	-1.97169	-1.40868	-1.6588	-0.89261	-0.75873	-1.38556	-1.67485	-1.69193	-2.06506
		240	-3.67528	-3.57458	-3.96855	-3.74038	-3.90684	-3.5677	-3.57481	-3.08237	-3.1611	-2.66794	-2.27587	-2.08461	-1.78833	-1.43766	-1.54018	-0.93279	-0.59282	-1.30597	-1.46608	-1.59848	-2.02418
		239	-3.61744	-3.53236	-3.89676	-3.72941	-3.98906	-3.50032	-3.63287	-2.93544	-3.03459	-2.58548	-2.12519	-2.16871	-1.74688	-1.24739	-1.51927	-0.87266	-0.67792	-1.36213	-1.5799	-1.6326	-2.06733
		238	-3.43485	-3.16577	-3.75365	-3.58651	-3.6212	-3.34943	-3.36378	-2.80134	-2.93083	-2.45197	-2.01586	-1.82153	-1.65072	-1.15294	-1.60601	-0.97702	-0.67486	-1.24804	-1.61115	-1.77866	-2.07542
		237	-3.08288	-2.95117	-3.39469	-3.11301	-3.35241	-3.04509	-3.13478	-2.5016	-2.70312	-2.08665	-1.90254	-1.93589	-1.64354	-1.12979	-1.32391	-0.76776	-0.5533	-1.34351	-1.52231	-1.43118	-1.96624
		236	-2.86011	-2.73285	-3.18993	-2.87731	-3.1824	-2.82393	-2.94626	-2.40769	-2.59204	-2.08508	-1.817	-1.72534	-1.63407	-0.90446	-1.3917	-0.87587	-0.59021	-1.18914	-1.47836	-1.65464	-2.16753
		235	-2.61753	-2.44042	-2.90107	-2.56724	-2.69366	-2.50119	-2.4862	-2.00164	-2.11077	-1.94039	-1.59391	-1.63668	-1.47513	-0.89419	-1.29219	-0.71803	-0.35254	-1.13381	-1.30461	-1.38198	-1.97754
		234	-2.19191	-2.06091	-2.45415	-2.10297	-2.57786	-2.245	-2.33479	-1.90419	-1.99514	-1.73268	-1.49906	-1.58633	-1.13016	-0.76592	-1.08805	-0.64478	-0.20573	-1.05355	-1.25496	-1.41371	-1.90454
		233	-2.01972	-1.72475	-2.16313	-1.90571	-2.20453	-2.06797	-2.08722	-1.64391	-1.81239	-1.62534	-1.10663	-1.33795	-1.22688	-0.66882	-1.01848	-0.4322	-0.11952	-0.98079	-1.19864	-1.40436	-2.01439
		232	-1.81799	-1.68853	-2.05858	-1.82256	-2.08385	-1.87927	-1.95399	-1.64188	-1.79769	-1.40175	-1.13614	-1.30907	-1.27398	-0.60655	-1.00354	-0.5684	-0.35142	-0.93919	-1.32547	-1.52019	-2.07614
		231	-1.56721	-1.4339	-1.84889	-1.50444	-1.90974	-1.62929	-1.76608	-1.44979	-1.61941	-1.29083	-1.04291	-1.26476	-1.07722	-0.55516	-1.03042	-0.67047	-0.1406	-1.02055	-1.18749	-1.31036	-1.89692
		230	-1.49683	-1.37086	-1.59296	-1.38684	-1.83402	-1.60532	-1.85815	-1.29903	-1.5691	-1.32958	-1.13764	-1.24715	-0.97736	-0.62396	-0.91248	-0.4587	-0.27367	-1.12888	-1.38805	-1.41019	-1.967
		229	-0.98268	-0.90874	-1.52582	-1.14829	-1.55684	-1.32796	-1.50652	-1.14679	-1.28335	-1.25593	-0.87421	-1.11555	-0.91388	-0.39272	-0.8715	-0.42961	-0.14993	-0.96947	-1.20943	-1.32305	-1.83501
		228	-1.00052	-0.87668	-1.43171	-1.11645	-1.59203	-1.21323	-1.55219	-1.2289	-1.30411	-1.1745	-0.75959	-1.01305	-1.01223	-0.52676	-0.95866	-0.45464	-0.04448	-1.06385	-1.13356	-1.33653	-2.05907
		227	-0.78299	-0.71352	-1.24317	-0.93416	-1.31343	-1.19161	-1.32652	-0.93397	-1.05813	-1.0336	-0.69148	-0.83172	-0.74795	-0.32397	-0.86108	-0.38793	-0.00827	-0.93563	-1.2159	-1.41852	-1.98921
		226	-0.71842	-0.5482	-1.14216	-0.93108	-1.07224	-1.1281	-1.09863	-0.92511	-1.05509	-0.85334	-0.52125	-0.85438	-0.76473	-0.27337	-0.86397	-0.16703	0.088941	-1.01958	-1.21292	-1.48778	-2.285
		225	-0.78493	-0.6487	-1.28266	-1.06788	-1.47847	-1.22729	-1.40584	-1.15189	-1.15136	-1.05803	-0.85014	-1.1352	-1.00476	-0.43555	-1.09382	-0.50803	-0.13822	-0.89424	-1.43512	-1.7883	-2.62373
		224	-0.57771	-0.36712	-0.93752	-0.63633	-0.87659	-0.97365	-1.13425	-0.81329	-0.84816	-0.83354	-0.63551	-1.00284	-0.58366	-0.19193	-0.5853	-0.29161	0.021878	-0.94322	-1.2085	-1.77887	-2.39386
		223	-0.36643	-0.41566	-0.94115	-0.59009	-1.14084	-0.84771	-0.94799	-0.83708	-0.89754	-0.83709	-0.47697	-0.87546	-0.76219	-0.41008	-0.85459	-0.35366	-0.09696	-1.11883	-1.35838	-1.9225	-2.76242
		222	-0.5608	-0.37373	-0.89916	-0.35831	-1.15673	-0.81698	-1.07574	-0.94678	-0.83627	-0.96347	-0.69081	-1.04093	-0.79845	-0.47449	-0.82865	-0.51674	-0.0072	-1.1388	-1.56552	-1.78745	-3.08768
		221	-0.16339	-0.01422	-0.72758	-0.26306	-0.76996	-0.59023	-0.81931	-0.48739	-0.66493	-0.7451	-0.48007	-0.72407	-0.57045	-0.28562	-0.92189	-0.3351	-0.00056	-1.00582	-1.4171	-2.11141	-3.18501
		220	-0.01151	-0.04489	-0.66231	-0.27096	-0.59888	-0.47971	-0.76206	-0.54605	-0.78196	-0.78562	-0.45061	-0.72419	-0.65697	-0.30207	-0.86902	-0.22785	-0.09979	-1.22194	-1.68036	-2.10091	-2.99736
		219	0.430115	0.476005	-0.14706	0.082578	-0.48898	-0.0174	-0.66211	-0.5303	-0.54392	-0.49508	-0.23334	-0.66623	-0.62786	-0.22035	-0.78171	-0.2922	0.150441	-1.05287	-1.59009	-2.16279	-3.26479
		218	0.731194	0.570739	0.155404	0.452481	-0.23872	0.009769	-0.32713	-0.05305	-0.25257	-0.29803	-0.11105	-0.52691	-0.23346	-0.05333	-0.77317	-0.04347	0.121941	-1.09093	-1.78424	-1.97566	-3.2955
		217	1.13114	0.889852	0.222632	0.500907	0.125678	0.307642	-0.07606	-0.17649	-0.31324	-0.35288	0.022529	-0.64661	-0.4744	-0.19935	-0.84284	-0.3598	-0.06498	-1.23461	-2.03997	-2.29212	-3.87604
		216	1.6632	1.55946	0.870851	1.32819	0.527824	0.793198	0.545869	0.229135	0.286152	-0.06799	0.245477	-0.22318	-0.31724	0.094258	-0.53174	-0.11386	0.281516	-1.05056	-1.67291	-2.26776	-3.69713
		215	2.11641	1.9157	1.46115	1.58168	0.919708	0.887661	0.6519	0.327722	0.28664	-0.12904	0.001538	-0.35423	-0.54648	-0.05381	-0.7876	-0.30175	-0.04756	-1.32538	-2.16448	-2.64131	-4.34918
		214	2.83492	2.72954	1.95327	2.21998	1.51262	1.57888	1.09098	0.936105	0.536064	0.285865	0.478304	-0.49783	-0.31052	0.044961	-0.71537	-0.25834	-0.02624	-1.63684	-2.31511	-3.02621	-4.78028
		213	3.51009	3.25006	2.70406	2.9091	2.12529	2.10212	1.54968	1.21609	0.823923	0.494829	0.455871	-0.14538	-0.20362	-0.0222	-0.74674	-0.4791	-0.15614	-1.69224	-2.77358	-3.19524	-5.30325
		212	4.30406	4.06455	3.42675	3.60699	2.58426	2.74598	2.1949	1.6112	1.47022	0.766531	1.04981	-0.14654	-0.1146	0.117907	-0.74293	-0.37783	-0.07157	-1.73909	-2.87724	-4.08349	-5.80976
		211	4.80562	4.75036	3.84474	4.23221	3.09186	3.05606	2.52217	1.89574	1.75082	0.893127	0.889201	-0.02085	-0.05486	0.115015	-0.57083	-0.48028	-0.11822	-1.90496	-3.1363	-4.46126	-7.20523
		210	5.46091	5.19163	4.44676	4.57697	3.78331	3.46637	2.91799	2.22205	1.86351	1.02998	1.10842	0.204516	0.019907	0.106601	-0.60109	-0.53208	-0.20546	-2.05935	-3.62573	-5.50323	-8.21455
		209	5.52688	5.5069	4.6952	4.83845	4.08934	3.75302	2.9236	2.25964	1.9245	1.19029	1.232	0.214149	0.099524	0.0124	-0.87469	-0.5276	-0.34742	-2.45668	-4.26014	-6.54578	-10.0688
		208	5.69204	5.85375	4.97369	4.97131	4.05318	3.70141	2.97114	2.5633	2.12574	1.30932	1.2282	0.121967	0.158083	0.112183	-0.67039	-0.54487	-0.42174	-2.72315	-4.81058	-7.38043	-11.5976
		207	5.47925	5.77942	4.78814	4.94967	3.76158	3.61701	2.9582	2.39222	1.97726	1.01495	1.04999	-0.1177	-0.27282	-0.0271	-0.83507	-0.75161	-0.63145	-3.27021	-5.79125	-9.08542	-13.7503
		206	5.22645	5.63159	4.71914	4.95518	3.86125	3.63794	2.9559	2.3208	2.00643	1.26947	1.07133	0.006169	0.148794	-0.05214	-0.80384	-0.74325	-0.68319	-3.61671	-6.2274	-10.1786	-15.5138
		205	5.0952	5.37682	4.62655	4.65851	3.61914	3.61548	2.81728	2.12121	1.98415	0.960813	1.12515	0.051992	-0.04097	-0.03284	-0.76876	-0.58429	-0.67313	-4.05803	-7.04008	-11.4765	-16.9158
		204	4.77536	5.05	4.2046	4.29519	3.25611	3.1055	2.34699	1.91809	1.57703	0.690583	0.982062	-0.03698	-0.19469	-0.162	-0.94192	-0.86652	-0.70148	-4.32353	-7.77784	-12.866	-19.5146
		203	4.25608	4.66544	3.47692	3.84046	2.82101	2.61438	2.09909	1.75364	1.5991	0.447166	0.96274	-0.03536	-0.06923	-0.22628	-0.82255	-0.41405	-0.75915	-4.63817	-8.54454	-13.9308	-21.3568
		202	3.21704	3.85982	2.95312	2.99652	1.83393	2.03403	1.42274	1.13496	1.02091	0.102578	0.497714	-0.33119	-0.26777	-0.7432	-0.92867	-1.07501	-1.26459	-4.88835	-9.23786	-15.3108	-23.2898
		201	2.66586	3.44216	2.25876	2.64162	1.47316	1.61926	1.15877	0.933344	0.527391	0.034753	0.493739	-0.38012	-0.30666	-0.45451	-1.10031	-0.8426	-1.0477	-5.21027	-9.73021	-16.1448	-24.7062
		200	1.87278	2.85319	1.6149	1.82771	0.943704	1.13856	0.6692	0.627284	0.265065	-0.20593	0.253504	-0.59779	-0.43226	-0.42449	-0.95302	-0.97734	-1.15988	-5.44106	-10.0297	-16.7873	-26.4286
		199	1.0949	1.86628	0.72904	1.32383	0.26017	0.440971	0.004451	0.069511	-0.20984	-0.53476	-0.13072	-0.87548	-0.64769	-0.56014	-1.19003	-1.07109	-1.17674	-5.47651	-10.3711	-16.9163	-26.5789
		198	0.165699	1.09263	-0.15688	0.364815	-0.35184	0.006248	-0.48853	-0.50608	-0.52534	-0.76756	-0.23302	-0.85909	-0.33656	-0.69363	-0.76213	-0.70605	-1.06655	-5.60513	-10.4023	-16.7942	-26.1648
		197	-0.61673	0.27125	-0.33679	-0.14799	-0.62735	-0.59506	-0.94049	-0.59406	-0.41439	-0.83422	-0.13261	-0.47018	-0.25689	-0.31455	-0.78303	-0.51716	-0.90486	-5.03684	-9.65814	-16.2167	-24.542
		196	-0.95886	-0.3297	-1.33136	-0.7209	-1.55161	-1.57847	-1.32005	-0.80788	-1.15235	-1.07312	-0.41909	-0.88021	-0.57212	-0.56124	-0.71725	-0.52545	-0.97972	-5.05009	-8.61745	-13.6895	-23.5456
		195	-2.4968	-0.30889	-1.58125	-1.61295	-1.92516	-1.68326	-1.74039	-0.63088	-1.18183	-0.77557	-0.10028	-0.81027	0.388668	0.106509	-0.71249	-0.35403	-0.72807	-4.25532	-8.38536	-11.5981	-19.112
		194	-3.19625	-1.36658	-2.83682	-2.02087	-2.49148	-1.82769	-2.66815	-1.42636	-1.61164	-1.88091	-1.39736	-0.77412	0.714127	0.010353	-0.11665	-0.39882	0.162221	-4.09002	-5.4257	-6.5373	-19.1965
		193	-3.47602	-1.11326	-2.36262	-1.86151	-2.91213	-2.54535	-2.02402	0.624547	-1.7214	-0.83833	-0.5054	-0.64837	1.06267	0.156258	-0.35953	-0.17322	-0.43962	2.20094	0.245445		1.819

## Sheet: Figure 6a 2
Figure 6a
Evaluation of CD titration									Fit
		sRSM (μM)	265 nm	198 nm					sRSM (μM)	265 nm	198 nm
		0.3125	9.6659	1.09263					0	9.75959	0
		0.625	9.32839	-0.156884					0.225	9.53734	-0.0484341
		0.9375	9.20927	0.364815					0.45	9.3151	-0.0968683
		1.25	8.41605	-0.351836					0.675	9.03499	-0.113111
		1.75	8.03756	0.00624762					0.9	8.7537	-0.128691
		2.5	7.09111	-0.488527					1.125	8.46361	-0.139378
		3	5.65372	-0.506079					1.35	8.17315	-0.14986
		4.375	3.78463	-0.767562					1.575	7.87956	-0.1586
		3.75	5.60655	-0.525343					1.8	7.58577	-0.167228
		5	3.34866	-0.233022					2.025	7.29084	-0.175225
		6	1.54036	-0.859087					2.25	6.99582	-0.183166
		6.4	1.19465	-0.336564					2.475	6.70071	-0.19106
		6.75	1.17538	-0.693626					2.7	6.40559	-0.198949
		7	-0.0677899	-0.762134					2.925	6.11114	-0.207211
		9	-0.231604	-0.706052					3.15	5.81678	-0.215525
		10	0.105324	-1.06655					3.375	5.52382	-0.224611
		15	-0.334131	-5.60513					3.6	5.23108	-0.233825
		20	-0.550131	-10.4023					3.825	4.94056	-0.244276
		30	0.328479	-16.7942					4.05	4.65048	-0.254966
		40	0.428679	-26.1648					4.275	4.36373	-0.267512
									4.5	4.07772	-0.280472
									4.725	3.79668	-0.296189
									4.95	3.51688	-0.312604
									5.175	3.24452	-0.333155
									5.4	2.97428	-0.354887
									5.625	2.7153	-0.382883
									5.85	2.45992	-0.412884
									6.075	2.22144	-0.452286
									6.3	1.98898	-0.495036
									6.525	1.78039	-0.551065
									6.75	1.5812	-0.612332
									6.975	1.4113	-0.689887
									7.2	1.25412	-0.774524
									7.425	1.12595	-0.875297
									7.65	1.01162	-0.983776
									7.875	0.920347	-1.10508
									8.1	0.841133	-1.23309
									8.325	0.77762	-1.36984
									8.55	0.723081	-1.51159
									8.775	0.678516	-1.65888
									9	0.640165	-1.80963
									9.225	0.608089	-1.96387
									9.45	0.580266	-2.12048
									9.675	0.55646	-2.27932
									9.9	0.535614	-2.43981
									10.125	0.517416	-2.60177
									10.35	0.501336	-2.76491
									10.575	0.487054	-2.92905
									10.8	0.474334	-3.09406
									11.025	0.462868	-3.25977
									11.25	0.452583	-3.42613
									11.475	0.443196	-3.593
									11.7	0.434724	-3.76037
									11.925	0.426909	-3.92811
									12.15	0.41982	-4.09625
									12.375	0.413221	-4.26467
									12.6	0.407208	-4.43341
									12.825	0.401566	-4.60236
									13.05	0.396406	-4.77157
									13.275	0.391529	-4.94095
									13.5	0.387054	-5.11055
									13.725	0.382799	-5.28027
									13.95	0.378883	-5.45017
									14.175	0.375138	-5.62018
									14.4	0.371682	-5.79034
									14.625	0.368362	-5.96058
									14.85	0.365291	-6.13096
									15.075	0.362328	-6.3014
									15.3	0.359582	-6.47196
									15.525	0.356922	-6.64257
									15.75	0.354452	-6.81328
									15.975	0.352052	-6.98403
									16.2	0.349819	-7.15487
									16.425	0.347641	-7.32575
									16.65	0.345613	-7.49671
									16.875	0.343629	-7.66769
									17.1	0.341778	-7.83875
									17.325	0.339964	-8.00983
									17.55	0.338268	-8.18097
									17.775	0.336602	-8.35213
									18	0.335044	-8.52335
									18.225	0.333509	-8.69458
									18.45	0.332071	-8.86587
									18.675	0.330652	-9.03717
									18.9	0.329322	-9.20852
									19.125	0.328007	-9.37987
									19.35	0.326773	-9.55127
									19.575	0.32555	-9.72268
									19.8	0.324402	-9.89413
									20.025	0.323263	-10.0656
									20.25	0.32219	-10.2371
									20.475	0.321125	-10.4086
									20.7	0.320123	-10.5801
									20.925	0.319126	-10.7516
									21.15	0.318187	-10.9232
									21.375	0.317252	-11.0948
									21.6	0.316371	-11.2664
									21.825	0.315491	-11.438
									22.05	0.314663	-11.6096
									22.275	0.313835	-11.7812
									22.5	0.313054	-11.9529
									22.725	0.312274	-12.1245
									22.95	0.311537	-12.2962
									23.175	0.3108	-12.4679
									23.4	0.310102	-12.6396
									23.625	0.309406	-12.8113
									23.85	0.308744	-12.983
									24.075	0.308085	-13.1547
									24.3	0.307457	-13.3264
									24.525	0.306832	-13.4982
									24.75	0.306235	-13.6699
									24.975	0.305641	-13.8417
									25.2	0.305073	-14.0135
									25.425	0.304509	-14.1852
									25.65	0.303968	-14.357
									25.875	0.303431	-14.5288
									26.1	0.302914	-14.7006
									26.325	0.302401	-14.8724
									26.55	0.301908	-15.0442
									26.775	0.301418	-15.216
									27	0.300946	-15.3879
									27.225	0.300479	-15.5597
									27.45	0.300028	-15.7315
									27.675	0.299581	-15.9034
									27.9	0.299149	-16.0752
									28.125	0.298721	-16.2471
									28.35	0.298307	-16.4189
									28.575	0.297898	-16.5908
									28.8	0.297501	-16.7626
									29.025	0.297108	-16.9345
									29.25	0.296727	-17.1064
									29.475	0.29635	-17.2783
									29.7	0.295983	-17.4502
									29.925	0.295622	-17.622
									30.15	0.295269	-17.7939
									30.375	0.294921	-17.9658
									30.6	0.294582	-18.1377
									30.825	0.294248	-18.3096
									31.05	0.293921	-18.4815
									31.275	0.2936	-18.6534
									31.5	0.293285	-18.8253
									31.725	0.292975	-18.9973
									31.95	0.292671	-19.1692
									32.175	0.292373	-19.3411
									32.4	0.29208	-19.513
									32.625	0.291792	-19.685
									32.85	0.291509	-19.8569
									33.075	0.291231	-20.0288
									33.3	0.290958	-20.2007
									33.525	0.290689	-20.3727
									33.75	0.290424	-20.5446
									33.975	0.290162	-20.7166
									34.2	0.289906	-20.8885
									34.425	0.289654	-21.0605
									34.65	0.289406	-21.2324
									34.875	0.289162	-21.4044
									35.1	0.288922	-21.5763
									35.325	0.288687	-21.7483
									35.55	0.288454	-21.9202
									35.775	0.288226	-22.0922
									36	0.288001	-22.2641
									36.225	0.28778	-22.4361
									36.45	0.287561	-22.6081
									36.675	0.287347	-22.78
									36.9	0.287135	-22.952
									37.125	0.286928	-23.124
									37.35	0.286722	-23.296
									37.575	0.28652	-23.4679
									37.8	0.286321	-23.6399
									38.025	0.286125	-23.8119
									38.25	0.285931	-23.9839
									38.475	0.285741	-24.1558
									38.7	0.285552	-24.3278
									38.925	0.285368	-24.4998
									39.15	0.285184	-24.6718
									39.375	0.285005	-24.8438
									39.6	0.284827	-25.0158
									39.825	0.284652	-25.1878
									40.05	0.284479	-25.3598
									40.275	0.284309	-25.5318
									40.5	0.28414	-25.7037
									40.725	0.283975	-25.8757
									40.95	0.283811	-26.0477
									41.175	0.28365	-26.2197
									41.4	0.28349	-26.3917
									41.625	0.283334	-26.5637
									41.85	0.283178	-26.7357
									42.075	0.283026	-26.9077
									42.3	0.282874	-27.0797
									42.525	0.282725	-27.2517
									42.75	0.282577	-27.4237
									42.975	0.282433	-27.5958
									43.2	0.282288	-27.7678
									43.425	0.282147	-27.9398
									43.65	0.282006	-28.1118
									43.875	0.281867	-28.2838
									44.1	0.281728	-28.4558
									44.325	0.281593	-28.6278
									44.55	0.281458	-28.7998
									44.775	0.281326	-28.9718
									45	0.281194	-29.1438

## Sheet: Figure 6b
Figure 6b
Evaluation of NMR experiment									Fit
		sRSM (μM)	S5 2	S6 2	S7 2				sRSM (μM)	S5	S6	S7
		2.48	198.387	-32.5942	3.04065				1	226.917	-67.6076	7.69756
		4.9	174.419	-10.3661	-6.40661				1.2	222.434	-61.9618	6.07985
		7.28	157.555	12.5811	-13.6484				1.4	218.573	-57.0989	4.78914
		10.77	132.663	25.552	-10.9308				1.6	214.752	-52.2865	3.51952
		14.15	117.012	28.5548	-6.00147				1.8	211.375	-48.106	2.47756
		17.44	93.8747	39.8703	-2.58322				2	208.038	-43.9811	1.45561
		20.64	80.5793	36.629	-2.67116				2.2	205.022	-40.3394	0.596528
		23.76	69.0904	38.6817	4.76689				2.4	202.043	-36.752	-0.244253
		27.77	59.9351	38.4862	12.2822				2.6	199.307	-33.5428	-0.962594
		32.6	41.4778	30.0443	21.3229				2.8	196.605	-30.3858	-1.66405
		38.14	24.6882	15.0316	17.0264				3	194.095	-27.5338	-2.26942
									3.2	191.617	-24.732	-2.85897
									3.4	189.288	-22.1698	-3.3744
									3.6	186.987	-19.6536	-3.87554
									3.8	184.805	-17.3293	-4.31782
									4	182.65	-15.0476	-4.74703
									4.2	180.602	-12.9444	-5.12302
									4.4	178.581	-10.8864	-5.48555
									4.6	176.64	-8.95771	-5.80908
									4.8	174.72	-7.06601	-6.12147
									5	172.876	-5.29934	-6.39694
									5.2	171.056	-3.57268	-6.66061
									5.4	169.291	-1.93873	-6.89668
									5.6	167.546	-0.3378	-7.12291
									5.8	165.86	1.16392	-7.32057
									6	164.197	2.62651	-7.50696
									6.2	162.575	4.01999	-7.67292
									6.4	160.971	5.38342	-7.83
									6.6	159.408	6.6784	-7.96735
									6.8	157.863	7.94069	-8.09528
									7	156.355	9.14114	-8.20538
									7.2	154.866	10.3093	-8.30614
									7.4	153.404	11.4317	-8.39359
									7.6	151.958	12.5281	-8.47343
									7.8	150.542	13.5713	-8.53826
									8	149.146	14.5813	-8.59375
									8.2	147.772	15.5521	-8.63793
									8.4	146.415	16.4962	-8.67445
									8.6	145.077	17.4061	-8.70111
									8.8	143.754	18.2907	-8.72051
									9	142.451	19.1413	-8.73034
									9.2	141.164	19.9649	-8.73251
									9.4	139.894	20.757	-8.72579
									9.6	138.641	21.5218	-8.71134
									9.8	137.401	22.2625	-8.69
									10	136.175	22.9805	-8.66218
									10.2	134.963	23.675	-8.62775
									10.4	133.764	24.3456	-8.58659
									10.6	132.579	24.9927	-8.53884
									10.8	131.409	25.6137	-8.48378
									11	130.249	26.2162	-8.42347
									11.2	129.103	26.7964	-8.35687
									11.4	127.965	27.361	-8.28585
									11.6	126.839	27.9053	-8.20909
									11.8	125.723	28.4331	-8.12771
									12	124.62	28.9372	-8.03981
									12.2	123.526	29.4261	-7.94763
									12.4	122.446	29.8916	-7.8489
									12.6	121.372	30.345	-7.74681
									12.8	120.31	30.7785	-7.63912
									13	119.254	31.2016	-7.52848
									13.2	118.208	31.6054	-7.41245
									13.4	117.169	32.0001	-7.29384
									13.6	116.139	32.3765	-7.17008
									13.8	115.117	32.7414	-7.04319
									14	114.108	33.0811	-6.90944
									14.2	113.104	33.413	-6.7735
									14.4	112.111	33.726	-6.63229
									14.6	111.122	34.0322	-6.48915
									14.8	110.143	34.32	-6.3409
									15	109.167	34.6021	-6.19103
									15.2	108.202	34.867	-6.03638
									15.4	107.239	35.1269	-5.88031
									15.6	106.286	35.3699	-5.71955
									15.8	105.337	35.6067	-5.5571
									16	104.4	35.8204	-5.38833
									16.2	103.466	36.0299	-5.21843
									16.4	102.542	36.2222	-5.04373
									16.6	101.62	36.4109	-4.86807
									16.8	100.707	36.5827	-4.68769
									17	99.7962	36.7516	-4.5065
									17.2	98.8948	36.9039	-4.32073
									17.4	97.9948	37.0537	-4.13428
									17.6	97.1039	37.1876	-3.9434
									17.8	96.2141	37.3196	-3.75199
									18	95.3329	37.4366	-3.55639
									18.2	94.453	37.5513	-3.36021
									18.4	93.585	37.6446	-3.15825
									18.6	92.7177	37.7366	-2.95595
									18.8	91.8598	37.8123	-2.74913
									19	91.0024	37.8872	-2.54208
									19.2	90.1538	37.9465	-2.33073
									19.4	89.3055	38.0052	-2.11924
									19.6	88.4657	38.049	-1.90362
									19.8	87.6261	38.0927	-1.68796
									20	86.7946	38.122	-1.46833
									20.2	85.9631	38.1513	-1.24871
									20.4	85.1393	38.1671	-1.02536
									20.6	84.3156	38.1829	-0.801976
									20.8	83.5018	38.1807	-0.573803
									21	82.6884	38.1781	-0.34548
									21.2	81.8832	38.1608	-0.113157
									21.4	81.0785	38.1427	0.119379
									21.6	80.281	38.112	0.355385
									21.8	79.484	38.0803	0.591655
									22	78.6938	38.0366	0.831205
									22.2	77.9043	37.9917	1.07108
									22.4	77.1212	37.9356	1.31405
									22.6	76.3389	37.878	1.55741
									22.8	75.5626	37.8098	1.80367
									23	74.7872	37.74	2.05036
									23.2	74.0175	37.6604	2.29975
									23.4	73.2487	37.5791	2.54962
									23.6	72.485	37.4888	2.80196
									23.8	71.7224	37.3966	3.05481
									24	70.9659	37.2936	3.31055
									24.2	70.2107	37.188	3.56698
									24.4	69.4616	37.0719	3.82627
									24.6	68.714	36.9529	4.08634
									24.8	67.9711	36.8256	4.34867
									25	67.2297	36.6957	4.61168
									25.2	66.4927	36.5581	4.87682
									25.4	65.7572	36.4178	5.14267
									25.6	65.0259	36.2702	5.41051
									25.8	64.2961	36.1199	5.6791
									26	63.5701	35.9628	5.94954
									26.2	62.8458	35.8029	6.22075
									26.4	62.1251	35.6366	6.49368
									26.6	61.406	35.4675	6.7674
									26.8	60.6903	35.2925	7.04272
									27	59.9762	35.1145	7.31885
									27.2	59.2657	34.9303	7.59665
									27.4	58.5571	34.7427	7.87537
									27.6	57.8527	34.5474	8.15613
									27.8	57.1509	34.3476	8.43809
									28	56.4521	34.1425	8.7215
									28.2	55.7553	33.9339	9.00584
									28.4	55.0614	33.7203	9.29156
									28.6	54.3695	33.503	9.57824
									28.8	53.6803	33.281	9.8662
									29	52.9932	33.0554	10.1552
									29.2	52.3086	32.8253	10.4453
									29.4	51.6262	32.5914	10.7365
									29.6	50.9461	32.3533	11.0288
									29.8	50.2682	32.1115	11.3221
									30	49.5925	31.8658	11.6165
									30.2	48.919	31.6162	11.9118
									30.4	48.2476	31.3631	12.2082
									30.6	47.5783	31.1061	12.5056
									30.8	46.911	30.8459	12.8039
									31	46.2458	30.5818	13.1032
									31.2	45.5823	30.3148	13.4033
									31.4	44.921	30.0441	13.7044
									31.6	44.2617	29.7696	14.0065
									31.8	43.6053	29.49	14.3099
									32	42.951	29.2069	14.6143
									32.2	42.2996	28.9185	14.92
									32.4	41.6498	28.6274	15.2265
									32.6	41.0024	28.3321	15.5341
									32.8	40.3564	28.0343	15.8424
									33	39.7129	27.7323	16.1518
									33.2	39.0706	27.428	16.4618
									33.4	38.4309	27.1194	16.7729
									33.6	37.7923	26.8088	17.0846
									33.8	37.1563	26.4938	17.3975
									34	36.5213	26.177	17.7108
									34.2	35.8888	25.856	18.0252
									34.4	35.2573	25.5332	18.3401
									34.6	34.6283	25.2062	18.6562
									34.8	34.0002	24.8776	18.9726
									35	33.3745	24.5449	19.2901
									35.2	32.7497	24.2108	19.608
									35.4	32.1273	23.8725	19.927
									35.6	31.5057	23.533	20.2463
									35.8	30.8865	23.1894	20.5667
									36	30.2683	22.844	20.8876
									36.2	29.6542	22.4914	21.2103
									36.4	29.0407	22.1378	21.5332
									36.6	28.43	21.7796	21.8574
									36.8	27.8199	21.4204	22.1818
									37	27.2125	21.0566	22.5074
									37.2	26.6056	20.6921	22.8331
									37.4	26.0015	20.3229	23.1601
									37.6	25.3978	19.9531	23.4872
									37.8	24.7969	19.5786	23.8156
									38	24.1964	19.2036	24.144
									38.2	23.5987	18.8239	24.4736
									38.4	23.0013	18.4439	24.8034
									38.6	22.4068	18.0592	25.1342
									38.8	21.8124	17.6743	25.4652
									39	21.221	17.2848	25.7972
									39.2	20.6296	16.8951	26.1293
									39.4	20.0411	16.5011	26.4625
									39.6	19.4527	16.107	26.7957
									39.8	18.8671	15.7088	27.1299
									40	18.2814	15.3106	27.464

## Sheet: Figure 6c
Figure 6c
Turbidity of 10 μM T95-2T G4 in the complex with increasing concentration of sRSM (3 replicates)											Fit
		sRSM (μM)	OD (600 nm)								sRSM (μM)	OD (600 nm)
		0	0	0	0						0	0
		0.625	-0.001	0	0						0.225	0.000256855
		1.25	0.001	0.002	0.001						0.45	0.00051371
		2.5	0.011	0.009	0.011						0.675	0.00106698
		5	0.023	0.026	0.02						0.9	0.00162637
		10	0.039	0.037	0.032						1.125	0.00233281
		20	0.031	0.041	0.021						1.35	0.00304545
		40	0.038	0.038	0.026						1.575	0.00385062
		2.25	0.003	0.015	0.007						1.8	0.00466175
		4.5	0.011	0.02	0.015						2.025	0.00553718
		9	0.03	0.031	0.025						2.25	0.00641827
		5.5	0.016	0.026	0.018						2.475	0.00734635
		0.46	-0.001	0.001	0.001						2.7	0.00827971
		0.93	0	0.001	0						2.925	0.00924836
		1.875	0.002	0.004	0.002						3.15	0.0102219
		3.75	0.014	0.013	0.013						3.375	0.011222
		7.5	0.034	0.038	0.028						3.6	0.0122265
		15	0.033	0.039	0.025						3.825	0.0132505
		30	0.026	0.036	0.027						4.05	0.0142782
		1.5	0.002	0.005	0.001						4.275	0.0153191
		3	0.006	0.013	0.008						4.5	0.0163629
		6	0.021	0.027	0.02						4.725	0.0174133
		12	0.036	0.034	0.025						4.95	0.0184655
		7	0.021	0.031	0.024						5.175	0.019517
		8	0.03	0.039	0.025						5.4	0.0205682
		8.5	0.033	0.042	0.031						5.625	0.0216093
											5.85	0.0226472
											6.075	0.0236616
											6.3	0.0246676
											6.525	0.025631
											6.75	0.0265776
											6.975	0.0274558
											7.2	0.0283043
											7.425	0.0290573
											7.65	0.0297647
											7.875	0.030363
											8.1	0.0309043
											8.325	0.0313468
											8.55	0.031733
											8.775	0.0320459
											9	0.0323133
											9.225	0.0325324
											9.45	0.0327187
											9.675	0.0328745
											9.9	0.0330078
											10.125	0.0331216
											10.35	0.03322
											10.575	0.0333057
											10.8	0.0333804
											11.025	0.0334467
											11.25	0.0335051
											11.475	0.0335577
											11.7	0.0336044
											11.925	0.033647
											12.15	0.0336851
											12.375	0.0337202
											12.6	0.0337518
											12.825	0.0337812
											13.05	0.0338078
											13.275	0.0338327
											13.5	0.0338554
											13.725	0.0338768
											13.95	0.0338965
											14.175	0.0339151
											14.4	0.0339322
											14.625	0.0339485
											14.85	0.0339634
											15.075	0.0339778
											15.3	0.0339911
											15.525	0.0340038
											15.75	0.0340156
											15.975	0.034027
											16.2	0.0340376
											16.425	0.0340478
											16.65	0.0340574
											16.875	0.0340666
											17.1	0.0340752
											17.325	0.0340837
											17.55	0.0340915
											17.775	0.0340993
											18	0.0341065
											18.225	0.0341136
											18.45	0.0341202
											18.675	0.0341267
											18.9	0.0341328
											19.125	0.0341388
											19.35	0.0341444
											19.575	0.0341499
											19.8	0.0341551
											20.025	0.0341603
											20.25	0.0341651
											20.475	0.0341699
											20.7	0.0341743
											20.925	0.0341788
											21.15	0.034183
											21.375	0.0341872
											21.6	0.0341911
											21.825	0.034195
											22.05	0.0341986
											22.275	0.0342023
											22.5	0.0342057
											22.725	0.0342092
											22.95	0.0342124
											23.175	0.0342156
											23.4	0.0342187
											23.625	0.0342217
											23.85	0.0342246
											24.075	0.0342275
											24.3	0.0342303
											24.525	0.034233
											24.75	0.0342357
											24.975	0.0342383
											25.2	0.0342408
											25.425	0.0342433
											25.65	0.0342457
											25.875	0.034248
											26.1	0.0342503
											26.325	0.0342525
											26.55	0.0342546
											26.775	0.0342567
											27	0.0342588
											27.225	0.0342608
											27.45	0.0342627
											27.675	0.0342646
											27.9	0.0342665
											28.125	0.0342683
											28.35	0.0342701
											28.575	0.0342718
											28.8	0.0342735
											29.025	0.0342752
											29.25	0.0342768
											29.475	0.0342784
											29.7	0.03428
											29.925	0.0342815
											30.15	0.034283
											30.375	0.0342845
											30.6	0.0342859
											30.825	0.0342873
											31.05	0.0342887
											31.275	0.0342901
											31.5	0.0342914
											31.725	0.0342928
											31.95	0.0342941
											32.175	0.0342954
											32.4	0.0342967
											32.625	0.0342979
											32.85	0.0342992
											33.075	0.0343004
											33.3	0.0343016
											33.525	0.0343027
											33.75	0.0343038
											33.975	0.034305
											34.2	0.034306
											34.425	0.0343071
											34.65	0.0343082
											34.875	0.0343092
											35.1	0.0343102
											35.325	0.0343112
											35.55	0.0343122
											35.775	0.0343131
											36	0.0343141
											36.225	0.034315
											36.45	0.0343159
											36.675	0.0343168
											36.9	0.0343177
											37.125	0.0343185
											37.35	0.0343194
											37.575	0.0343202
											37.8	0.034321
											38.025	0.0343218
											38.25	0.0343226
											38.475	0.0343234
											38.7	0.0343241
											38.925	0.0343249
											39.15	0.0343256
											39.375	0.0343264
											39.6	0.0343272
											39.825	0.034328
											40.05	0.0343287
											40.275	0.0343295
											40.5	0.0343302
											40.725	0.0343309
											40.95	0.0343317
											41.175	0.0343323
											41.4	0.034333
											41.625	0.0343337
											41.85	0.0343344
											42.075	0.034335
											42.3	0.0343357
											42.525	0.0343363
											42.75	0.0343369
											42.975	0.0343375
											43.2	0.0343381
											43.425	0.0343387
											43.65	0.0343393
											43.875	0.0343399
											44.1	0.0343405
											44.325	0.034341
											44.55	0.0343416
											44.775	0.0343421
											45	0.0343427

## Sheet: Figure 6d
Figure 6d
Kinetics of assembly/condensation of T95-2T-sRSM complex (Fluorescence)										Fit
			sRSM concentration (μM)								sRSM concentration (μM)
		Time (s)	0.62	1.25	2.5	5	10	20		Time (s)	0.62	1.25	2.5	5	10	20
		0.000975	0.996121	0.980625	0.989392	0.990241	1.00647	0.9997		0	1	1	1	1	1	1
		0.001975	0.99428	1.01214	0.982354	0.987714	1.0069	1.02072		0.0025	1.00034	1.00121	1.00181	1.00316	1.00689	1.01212
		0.002975	1.00331	1.01483	0.995533	0.995897	1.01218	1.0207		0.005	1.00065	1.00231	1.00343	1.00593	1.01253	1.02106
		0.003975	1.00181	1.01375	0.981548	1.00016	1.01782	1.0196		0.0075	1.00094	1.00331	1.00489	1.00837	1.01721	1.02779
		0.004975	0.991269	0.998554	0.992999	0.998178	1.01638	1.02169		0.01	1.00121	1.00422	1.00621	1.01054	1.02114	1.03297
		0.005975	1.00374	0.989637	0.984793	0.996555	1.01722	1.01445		0.0125	1.00145	1.00506	1.00741	1.01248	1.02448	1.03704
		0.006975	1.00688	1.01549	1.00677	1.01182	1.01682	1.02446		0.015	1.00168	1.00582	1.0085	1.01422	1.02735	1.04028
		0.007975	0.998635	1.01876	1.0038	1.00584	1.02177	1.02811		0.0175	1.00189	1.00652	1.0095	1.01578	1.02983	1.04291
		0.008975	1.00823	1.00885	1.00397	1.00574	1.01697	1.0303		0.02	1.00208	1.00716	1.01041	1.0172	1.032	1.04509
		0.009975	1.00406	1.0194	1.00482	1.00925	1.01479	1.02769		0.0225	1.00226	1.00775	1.01125	1.0185	1.03391	1.04692
		0.010975	1.00636	1.00325	1.00627	1.01578	1.03025	1.03466		0.025	1.00242	1.0083	1.01202	1.01968	1.03562	1.0485
		0.011975	1.01265	1.00904	1.00775	1.01881	1.02525	1.03102		0.0275	1.00257	1.00881	1.01274	1.02076	1.03714	1.04986
		0.012975	1.00366	0.993934	1.01159	1.01311	1.02396	1.03146		0.03	1.00272	1.00927	1.0134	1.02176	1.03852	1.05107
		0.013975	1.01337	1.01568	1.01917	1.0128	1.02565	1.03027		0.0325	1.00285	1.00971	1.01401	1.02269	1.03977	1.05216
		0.014975	0.998142	0.988705	1.01634	1.02504	1.02451	1.03252		0.035	1.00297	1.01012	1.01458	1.02355	1.04092	1.05314
		0.015975	0.994327	0.996744	1.0064	1.0144	1.02769	1.03909		0.0375	1.00308	1.01049	1.01511	1.02435	1.04197	1.05405
		0.016975	1.01245	0.985673	1.019	1.02811	1.02573	1.03182		0.04	1.00319	1.01085	1.01561	1.0251	1.04295	1.05489
		0.017975	0.989987	1.00261	1.00266	1.00844	1.01907	1.03133		0.0425	1.00328	1.01118	1.01608	1.02581	1.04386	1.05568
		0.018975	0.997761	1.00919	1.00213	1.02214	1.0318	1.02997		0.045	1.00338	1.01149	1.01652	1.02648	1.04472	1.05642
		0.019975	1.00137	1.00601	1.01389	1.02715	1.03105	1.04385		0.0475	1.00346	1.01178	1.01694	1.02711	1.04552	1.05713
		0.020975	0.996777	1.00848	1.00878	1.0241	1.03229	1.03418		0.05	1.00354	1.01205	1.01733	1.0277	1.04628	1.0578
		0.021975	1.012	0.989471	1.02314	1.02675	1.03001	1.04041		0.0525	1.00361	1.01231	1.0177	1.02827	1.04701	1.05844
		0.022975	1.00285	1.00701	1.00788	1.01436	1.03474	1.04141		0.055	1.00368	1.01256	1.01806	1.02881	1.0477	1.05906
		0.023975	1.01239	1.00273	1.0111	1.02848	1.0349	1.043		0.0575	1.00375	1.01279	1.01839	1.02933	1.04835	1.05966
		0.024975	1.00949	0.994978	1.00494	1.02173	1.04054	1.03153		0.06	1.00381	1.01301	1.01872	1.02983	1.04899	1.06023
		0.025975	1.00539	1.01461	1.0129	1.01873	1.03489	1.04334		0.0625	1.00386	1.01322	1.01902	1.0303	1.04959	1.06079
		0.026975	1.00414	1.01053	1.01151	1.03363	1.0352	1.04094		0.065	1.00392	1.01343	1.01932	1.03076	1.05018	1.06133
		0.027975	0.992997	1.0068	1.02154	1.0255	1.03889	1.04095		0.0675	1.00396	1.01362	1.0196	1.03121	1.05074	1.06185
		0.028975	1.00376	1.01033	1.01778	1.02334	1.034	1.04752		0.07	1.00401	1.0138	1.01988	1.03164	1.05129	1.06236
		0.029975	1.00469	1.01868	1.00355	1.03379	1.04445	1.05351		0.0725	1.00406	1.01398	1.02014	1.03205	1.05182	1.06285
		0.030975	1.01051	1.01923	1.02385	1.02144	1.04037	1.04836		0.075	1.0041	1.01415	1.0204	1.03245	1.05233	1.06333
		0.031975	1.00925	1.0107	1.02951	1.02332	1.04007	1.04569		0.0775	1.00414	1.01431	1.02064	1.03284	1.05283	1.06379
		0.032975	1.00194	1.00792	1.02202	1.01753	1.03858	1.04599		0.08	1.00417	1.01447	1.02088	1.03323	1.05332	1.06425
		0.033975	0.997788	1.01981	1.01881	1.02332	1.04006	1.04509		0.0825	1.00421	1.01462	1.02111	1.0336	1.05379	1.06469
		0.034975	0.998653	1.01424	1.01817	1.01671	1.03986	1.05056		0.085	1.00424	1.01477	1.02134	1.03396	1.05425	1.06512
		0.035975	1.00234	1.02016	1.01658	1.02169	1.04585	1.04933		0.0875	1.00427	1.01491	1.02156	1.03431	1.0547	1.06554
		0.036975	1.00336	1.02149	1.01422	1.03216	1.04119	1.05448		0.09	1.0043	1.01505	1.02177	1.03466	1.05514	1.06595
		0.037975	0.995288	1.00346	1.02101	1.01215	1.04129	1.05497		0.0925	1.00433	1.01518	1.02198	1.035	1.05557	1.06634
		0.038975	0.994701	0.991077	1.01147	1.02363	1.04149	1.04812		0.095	1.00436	1.01531	1.02219	1.03533	1.05599	1.06673
		0.039975	0.986976	1.01527	1.01424	1.02308	1.04433	1.05123		0.0975	1.00438	1.01544	1.02239	1.03566	1.05641	1.06711
		0.040975	1.01407	1.00917	1.03114	1.0366	1.04241	1.06348		0.1	1.00441	1.01556	1.02258	1.03597	1.05681	1.06748
		0.041975	0.99271	1.01166	1.00148	1.02974	1.0419	1.04955		0.1025	1.00443	1.01568	1.02277	1.03629	1.0572	1.06784
		0.042975	1.00267	1.00637	1.01962	1.03107	1.05058	1.05519		0.105	1.00445	1.0158	1.02296	1.0366	1.05759	1.06819
		0.043975	1.00161	1.01256	1.01909	1.04014	1.04832	1.05912		0.1075	1.00447	1.01592	1.02315	1.0369	1.05797	1.06854
		0.044975	1.01261	0.989005	1.02018	1.02707	1.04853	1.05025		0.11	1.00449	1.01603	1.02333	1.0372	1.05834	1.06887
		0.045975	1.00529	1.00709	1.03139	1.03812	1.05129	1.06191		0.1125	1.00451	1.01615	1.02351	1.03749	1.0587	1.0692
		0.046975	1.01268	1.00122	1.0109	1.03513	1.04681	1.0583		0.115	1.00453	1.01626	1.02369	1.03778	1.05905	1.06952
		0.047975	1.00499	1.01298	1.03346	1.03144	1.05281	1.05249		0.1175	1.00455	1.01636	1.02386	1.03807	1.0594	1.06984
		0.048975	1.01302	1.0169	1.02085	1.02941	1.05447	1.05521		0.12	1.00457	1.01647	1.02403	1.03835	1.05975	1.07014
		0.049975	1.00017	1.01292	1.01227	1.02881	1.05091	1.0621		0.1225	1.00459	1.01658	1.0242	1.03862	1.06008	1.07044
		0.055475	1.00922	1.01291	1.02282	1.0346	1.04921	1.05895		0.125	1.0046	1.01668	1.02437	1.0389	1.06041	1.07074
		0.065475	1.00038	1.01722	1.02463	1.03574	1.05162	1.06074		0.1275	1.00462	1.01678	1.02453	1.03917	1.06074	1.07102
		0.075475	1.00827	1.016	1.0251	1.04011	1.05676	1.06478		0.13	1.00464	1.01688	1.0247	1.03943	1.06105	1.0713
		0.085475	1.00501	1.01962	1.02832	1.03715	1.05697	1.06623		0.1325	1.00465	1.01698	1.02486	1.03969	1.06137	1.07158
		0.095475	1.00243	1.01565	1.0253	1.03948	1.05868	1.06837		0.135	1.00467	1.01708	1.02502	1.03995	1.06167	1.07184
		0.105475	1.00356	1.01753	1.029	1.04208	1.05981	1.07161		0.1375	1.00468	1.01718	1.02518	1.04021	1.06197	1.07211
		0.115475	1.00206	1.02021	1.02807	1.04087	1.05716	1.0722		0.14	1.0047	1.01727	1.02533	1.04046	1.06227	1.07236
		0.125475	0.999921	1.01714	1.03199	1.04208	1.06141	1.07357		0.1425	1.00471	1.01737	1.02549	1.04071	1.06256	1.07261
		0.135475	1.00578	1.01943	1.02783	1.04684	1.06181	1.074		0.145	1.00472	1.01746	1.02564	1.04096	1.06285	1.07286
		0.145475	1.00722	1.02056	1.03089	1.04562	1.065	1.07503		0.1475	1.00474	1.01755	1.02579	1.0412	1.06313	1.0731
		0.155475	1.00506	1.02046	1.03075	1.04932	1.0628	1.07722		0.15	1.00475	1.01765	1.02594	1.04144	1.0634	1.07334
		0.165475	1.00428	1.02076	1.02607	1.04545	1.06187	1.07948		0.1525	1.00476	1.01774	1.02609	1.04168	1.06367	1.07357
		0.175475	1.00318	1.02367	1.0309	1.04598	1.06273	1.07702		0.155	1.00478	1.01783	1.02624	1.04192	1.06394	1.07379
		0.185475	1.00298	1.01649	1.03484	1.04524	1.06821	1.07897		0.1575	1.00479	1.01792	1.02638	1.04215	1.0642	1.07401
		0.195475	1.00251	1.01758	1.02928	1.04819	1.06662	1.07933		0.16	1.0048	1.01801	1.02653	1.04238	1.06446	1.07423
		0.205475	1.00275	1.02677	1.032	1.04517	1.06711	1.08029		0.1625	1.00481	1.01809	1.02667	1.04261	1.06471	1.07444
		0.215475	1.0035	1.02055	1.03366	1.04726	1.06833	1.08038		0.165	1.00483	1.01818	1.02681	1.04283	1.06496	1.07465
		0.225475	1.00678	1.02315	1.02807	1.04743	1.06936	1.08052		0.1675	1.00484	1.01827	1.02695	1.04306	1.06521	1.07485
		0.235475	1.00287	1.0229	1.03332	1.04915	1.06853	1.08267		0.17	1.00485	1.01835	1.02709	1.04328	1.06545	1.07505
		0.245475	1.00049	1.0219	1.03537	1.04898	1.07092	1.08349		0.1725	1.00486	1.01844	1.02723	1.0435	1.06568	1.07525
		0.255475	1.00594	1.0191	1.02993	1.04661	1.06886	1.08355		0.175	1.00487	1.01852	1.02737	1.04371	1.06592	1.07544
		0.265475	1.00179	1.02316	1.03016	1.0507	1.07015	1.08192		0.1775	1.00489	1.01861	1.0275	1.04393	1.06615	1.07563
		0.275475	1.00478	1.02107	1.03345	1.04963	1.07199	1.085		0.18	1.0049	1.01869	1.02764	1.04414	1.06637	1.07582
		0.285475	1.00435	1.02404	1.0375	1.04905	1.07423	1.08685		0.1825	1.00491	1.01878	1.02777	1.04435	1.06659	1.076
		0.295475	1.00605	1.02694	1.03157	1.05304	1.07232	1.08484		0.185	1.00492	1.01886	1.02791	1.04456	1.06681	1.07617
		0.305475	1.00619	1.02645	1.02665	1.0522	1.07084	1.08479		0.1875	1.00493	1.01894	1.02804	1.04476	1.06703	1.07635
		0.315475	1.00557	1.02905	1.03435	1.04881	1.07041	1.08183		0.19	1.00494	1.01902	1.02817	1.04496	1.06724	1.07652
		0.325475	1.0089	1.02095	1.03717	1.04945	1.07145	1.08187		0.1925	1.00495	1.0191	1.0283	1.04517	1.06745	1.07669
		0.335475	1.00458	1.02369	1.03337	1.0502	1.07077	1.08418		0.195	1.00496	1.01918	1.02843	1.04536	1.06765	1.07685
		0.345475	1.00177	1.02701	1.03681	1.052	1.07422	1.08543		0.1975	1.00498	1.01926	1.02856	1.04556	1.06785	1.07701
		0.355475	1.00817	1.02168	1.03362	1.05213	1.07211	1.08503		0.2	1.00499	1.01934	1.02869	1.04576	1.06805	1.07717
		0.365475	1.00364	1.02322	1.03007	1.05298	1.07573	1.08729		0.2025	1.005	1.01942	1.02881	1.04595	1.06825	1.07733
		0.375475	1.00375	1.02155	1.03101	1.05305	1.07513	1.08656		0.205	1.00501	1.0195	1.02894	1.04614	1.06844	1.07748
		0.385475	1.00393	1.0259	1.03802	1.05098	1.07431	1.08813		0.2075	1.00502	1.01958	1.02907	1.04633	1.06863	1.07763
		0.395475	1.00342	1.02654	1.03802	1.05391	1.07343	1.08592		0.21	1.00503	1.01966	1.02919	1.04652	1.06882	1.07777
		0.405475	1.00578	1.02375	1.03632	1.05374	1.07385	1.08478		0.2125	1.00504	1.01974	1.02931	1.04671	1.069	1.07792
		0.415475	1.00805	1.02269	1.03434	1.05206	1.07825	1.08776		0.215	1.00505	1.01981	1.02944	1.04689	1.06918	1.07806
		0.425475	1.00677	1.02538	1.03512	1.05591	1.07484	1.08677		0.2175	1.00506	1.01989	1.02956	1.04707	1.06936	1.0782
		0.435475	1.00245	1.03076	1.03616	1.05312	1.07519	1.08767		0.22	1.00507	1.01997	1.02968	1.04725	1.06954	1.07833
		0.445475	1.00921	1.03437	1.0346	1.05222	1.07394	1.08777		0.2225	1.00508	1.02004	1.0298	1.04743	1.06971	1.07847
		0.455475	1.00365	1.02455	1.03538	1.05538	1.07752	1.08721		0.225	1.00509	1.02012	1.02992	1.04761	1.06988	1.0786
		0.465475	1.00245	1.02199	1.03727	1.05388	1.07533	1.08809		0.2275	1.0051	1.02019	1.03004	1.04779	1.07005	1.07873
		0.475475	1.00615	1.02636	1.03284	1.05464	1.07659	1.08445		0.23	1.00511	1.02027	1.03015	1.04796	1.07021	1.07886
		0.485475	1.00779	1.02986	1.03576	1.05642	1.07972	1.08644		0.2325	1.00512	1.02034	1.03027	1.04813	1.07038	1.07898
		0.495475	1.00652	1.02684	1.03846	1.05386	1.07615	1.0865		0.235	1.00513	1.02041	1.03039	1.0483	1.07054	1.0791
										0.2375	1.00514	1.02049	1.0305	1.04847	1.0707	1.07922
										0.24	1.00515	1.02056	1.03062	1.04864	1.07085	1.07934
										0.2425	1.00516	1.02063	1.03073	1.04881	1.07101	1.07946
										0.245	1.00517	1.02071	1.03084	1.04897	1.07116	1.07957
										0.2475	1.00518	1.02078	1.03096	1.04913	1.07131	1.07968
										0.25	1.00519	1.02085	1.03107	1.0493	1.07145	1.07979
										0.2525	1.0052	1.02092	1.03118	1.04946	1.0716	1.0799
										0.255	1.00521	1.02099	1.03129	1.04962	1.07174	1.08001
										0.2575	1.00522	1.02106	1.0314	1.04977	1.07188	1.08011
										0.26	1.00523	1.02113	1.03151	1.04993	1.07202	1.08021
										0.2625	1.00524	1.0212	1.03162	1.05008	1.07216	1.08032
										0.265	1.00525	1.02127	1.03173	1.05024	1.0723	1.08041
										0.2675	1.00526	1.02134	1.03183	1.05039	1.07243	1.08051
										0.27	1.00527	1.02141	1.03194	1.05054	1.07256	1.08061
										0.2725	1.00528	1.02148	1.03204	1.05069	1.07269	1.0807
										0.275	1.00529	1.02155	1.03215	1.05084	1.07282	1.08079
										0.2775	1.0053	1.02161	1.03225	1.05098	1.07294	1.08089
										0.28	1.00531	1.02168	1.03236	1.05113	1.07307	1.08097
										0.2825	1.00532	1.02175	1.03246	1.05127	1.07319	1.08106
										0.285	1.00533	1.02182	1.03256	1.05141	1.07331	1.08115
										0.2875	1.00534	1.02188	1.03266	1.05156	1.07343	1.08123
										0.29	1.00535	1.02195	1.03277	1.0517	1.07355	1.08132
										0.2925	1.00536	1.02201	1.03287	1.05184	1.07366	1.0814
										0.295	1.00537	1.02208	1.03297	1.05197	1.07378	1.08148
										0.2975	1.00538	1.02214	1.03307	1.05211	1.07389	1.08156
										0.3	1.00538	1.02221	1.03316	1.05225	1.074	1.08164
										0.3025	1.00539	1.02227	1.03326	1.05238	1.07411	1.08172
										0.305	1.0054	1.02234	1.03336	1.05251	1.07422	1.08179
										0.3075	1.00541	1.0224	1.03346	1.05265	1.07433	1.08187
										0.31	1.00542	1.02247	1.03355	1.05278	1.07443	1.08194
										0.3125	1.00543	1.02253	1.03365	1.05291	1.07454	1.08201
										0.315	1.00544	1.02259	1.03375	1.05303	1.07464	1.08208
										0.3175	1.00545	1.02266	1.03384	1.05316	1.07474	1.08215
										0.32	1.00546	1.02272	1.03393	1.05329	1.07484	1.08222
										0.3225	1.00547	1.02278	1.03403	1.05341	1.07494	1.08229
										0.325	1.00548	1.02284	1.03412	1.05354	1.07504	1.08235
										0.3275	1.00549	1.0229	1.03421	1.05366	1.07513	1.08242
										0.33	1.0055	1.02297	1.03431	1.05379	1.07523	1.08248
										0.3325	1.00551	1.02303	1.0344	1.05391	1.07532	1.08255
										0.335	1.00551	1.02309	1.03449	1.05403	1.07541	1.08261
										0.3375	1.00552	1.02315	1.03458	1.05415	1.0755	1.08267
										0.34	1.00553	1.02321	1.03467	1.05427	1.07559	1.08273
										0.3425	1.00554	1.02327	1.03476	1.05438	1.07568	1.08279
										0.345	1.00555	1.02333	1.03485	1.0545	1.07577	1.08285
										0.3475	1.00556	1.02339	1.03493	1.05461	1.07586	1.0829
										0.35	1.00557	1.02345	1.03502	1.05473	1.07594	1.08296
										0.3525	1.00558	1.02351	1.03511	1.05484	1.07603	1.08301
										0.355	1.00559	1.02356	1.0352	1.05496	1.07611	1.08307
										0.3575	1.0056	1.02362	1.03528	1.05507	1.07619	1.08312
										0.36	1.00561	1.02368	1.03537	1.05518	1.07627	1.08318
										0.3625	1.00561	1.02374	1.03545	1.05529	1.07635	1.08323
										0.365	1.00562	1.0238	1.03554	1.0554	1.07643	1.08328
										0.3675	1.00563	1.02385	1.03562	1.05551	1.07651	1.08333
										0.37	1.00564	1.02391	1.03571	1.05561	1.07659	1.08338
										0.3725	1.00565	1.02397	1.03579	1.05572	1.07666	1.08343
										0.375	1.00566	1.02402	1.03587	1.05583	1.07674	1.08347
										0.3775	1.00567	1.02408	1.03596	1.05593	1.07681	1.08352
										0.38	1.00568	1.02414	1.03604	1.05604	1.07689	1.08357
										0.3825	1.00569	1.02419	1.03612	1.05614	1.07696	1.08361
										0.385	1.00569	1.02425	1.0362	1.05624	1.07703	1.08366
										0.3875	1.0057	1.0243	1.03628	1.05634	1.0771	1.0837
										0.39	1.00571	1.02436	1.03636	1.05644	1.07717	1.08374
										0.3925	1.00572	1.02441	1.03644	1.05654	1.07724	1.08379
										0.395	1.00573	1.02447	1.03652	1.05664	1.07731	1.08383
										0.3975	1.00574	1.02452	1.0366	1.05674	1.07737	1.08387
										0.4	1.00575	1.02458	1.03668	1.05684	1.07744	1.08391
										0.4025	1.00576	1.02463	1.03676	1.05694	1.0775	1.08395
										0.405	1.00576	1.02468	1.03683	1.05703	1.07757	1.08399
										0.4075	1.00577	1.02474	1.03691	1.05713	1.07763	1.08403
										0.41	1.00578	1.02479	1.03699	1.05722	1.0777	1.08407
										0.4125	1.00579	1.02484	1.03706	1.05732	1.07776	1.0841
										0.415	1.0058	1.02489	1.03714	1.05741	1.07782	1.08414
										0.4175	1.00581	1.02495	1.03722	1.0575	1.07788	1.08418
										0.42	1.00582	1.025	1.03729	1.05759	1.07794	1.08421
										0.4225	1.00582	1.02505	1.03736	1.05769	1.078	1.08425
										0.425	1.00583	1.0251	1.03744	1.05778	1.07806	1.08428
										0.4275	1.00584	1.02515	1.03751	1.05787	1.07811	1.08432
										0.43	1.00585	1.02521	1.03759	1.05796	1.07817	1.08435
										0.4325	1.00586	1.02526	1.03766	1.05804	1.07823	1.08438
										0.435	1.00587	1.02531	1.03773	1.05813	1.07828	1.08441
										0.4375	1.00587	1.02536	1.0378	1.05822	1.07834	1.08445
										0.44	1.00588	1.02541	1.03788	1.05831	1.07839	1.08448
										0.4425	1.00589	1.02546	1.03795	1.05839	1.07844	1.08451
										0.445	1.0059	1.02551	1.03802	1.05848	1.0785	1.08454
										0.4475	1.00591	1.02556	1.03809	1.05856	1.07855	1.08457
										0.45	1.00592	1.02561	1.03816	1.05864	1.0786	1.0846
										0.4525	1.00592	1.02566	1.03823	1.05873	1.07865	1.08463
										0.455	1.00593	1.02571	1.0383	1.05881	1.0787	1.08465
										0.4575	1.00594	1.02576	1.03837	1.05889	1.07875	1.08468
										0.46	1.00595	1.0258	1.03844	1.05897	1.0788	1.08471
										0.4625	1.00596	1.02585	1.03851	1.05905	1.07885	1.08474
										0.465	1.00597	1.0259	1.03857	1.05913	1.0789	1.08476
										0.4675	1.00597	1.02595	1.03864	1.05921	1.07894	1.08479
										0.47	1.00598	1.026	1.03871	1.05929	1.07899	1.08481
										0.4725	1.00599	1.02605	1.03878	1.05937	1.07904	1.08484
										0.475	1.006	1.02609	1.03884	1.05945	1.07908	1.08486
										0.4775	1.00601	1.02614	1.03891	1.05953	1.07913	1.08489
										0.48	1.00602	1.02619	1.03898	1.0596	1.07917	1.08491
										0.4825	1.00602	1.02623	1.03904	1.05968	1.07922	1.08493
										0.485	1.00603	1.02628	1.03911	1.05975	1.07926	1.08496
										0.4875	1.00604	1.02633	1.03917	1.05983	1.0793	1.08498
										0.49	1.00605	1.02637	1.03923	1.0599	1.07934	1.085
										0.4925	1.00606	1.02642	1.0393	1.05998	1.07938	1.08502
										0.495	1.00606	1.02646	1.03936	1.06005	1.07942	1.08504
										0.4975	1.00607	1.02651	1.03943	1.06012	1.07947	1.08506
										0.5	1.00608	1.02656	1.03949	1.0602	1.07951	1.08509

[truncated: 54 more sheets: Figure 6e left, Figure 6g, Figure 6h, Figure 6e right, Figure 6i, Figure 7a, Figure 7b, Figure 7d, Figure 8a, Figure 8b, Figure 8c, Figure 8d, SuppFig 3a, SuppFig 4c, SuppFig 7b, SuppFig 7c, SuppFig 7e, SuppFig 7f, SuppFig 9a, SuppFig 11 …]
